# Supplementary material for: Sputum and blood transcriptomics characterisation of the inhaled PDE4 inhibitor CHF6001 on top of triple therapy in patients with chronic bronchitis
Source: Springer Nature journal article supplement (doi:10.1186/s12931-020-1329-y), 2020-03-20
Supplement: MOESM1 [file 12931_2020_1329_MOESM1_ESM.pdf]

# **Sputum and blood transcriptomics characterisation of the inhaled PDE4 inhibitor CHF6001 in COPD**

Mirco Govoni, Michele Bassi, Stefano Vezzoli, Germano Lucci, Aida Emirova, Marie Anna Nandeuil, Stefano Petruzzelli, Gera Jellema, Ebenezer Alfolabi, Brendan Colgan, Brian Leaker, Oliver Kornmann, Kai Michael Beeh, Henrik Watz, Dave Singh

## **Supplement**

## **Supplementary methods**

### ***Ethics committees***

The study was approved by two centralised ethics committees on behalf of the sites:

- UK: Health Research Authority, North West, Greater Manchester South Research Ethics Committee, Manchester (approval reference 16/NW/0553).
- Germany: Ethics Committee of Hesse Medical Association, Frankfurt am Main (approval reference FF 98/2016).

### ***Inclusion Criteria***

Patients had to meet all the following inclusion criteria to be eligible for enrolment into the study:

1. Written informed consent obtained prior to any study-related procedures;
2. Male or female aged  $\geq 40$  years;
3. A female was eligible to enter the study if she was of non-childbearing potential, i.e. physiologically incapable of becoming pregnant (e.g. postmenopausal women defined as being amenorrhoeic for  $\geq 12$  consecutive months without an alternative medical cause. If indicated, as per Investigator's request, post-menopausal status was confirmed by analysis of follicle-stimulating hormone levels, according to local laboratory ranges) or women permanently sterilised (e.g. bilateral oophorectomy, hysterectomy or bilateral salpingectomy). Women physiologically capable of becoming pregnant (i.e. women of childbearing potential) were eligible to enter the study if they had a negative pregnancy test at screening and agreed to use one or more of the following highly effective contraceptive measures:
  - a. Placement of an intrauterine device or intrauterine hormone-releasing system;
  - b. Combined (containing both oestrogen and progestogen) hormonal contraception associated with inhibition of ovulation (oral, intravaginal, transdermal);

- c. Progesterone-only hormonal contraception associated with inhibition of ovulation (oral, injectable, implantable);
- d. Bilateral tubal occlusion;
- e. Vasectomised partner.

Reliable contraception had to be maintained throughout the study.

Abstinence was acceptable when in line with the patient's preferred and usual lifestyle. A pregnancy serum test was performed in all women of childbearing potential at screening and at Day 32 of Period 3. A pregnancy urine test was performed in all women of childbearing potential at Day 1 and Day 32 of each treatment period and at the follow-up visit;

- 4. Patients with an established diagnosis of COPD (according to Global Initiative for Chronic Obstructive Lung Disease, 2015) at least 12 months prior to the screening visit;
- 5. A smoking history of at least 10 pack-years [pack-years = number of cigarettes per day x number of years/20]. Current and ex-smokers were eligible (smoking cessation was at least three months prior to the screening. If the patients underwent smoking cessation therapy, it must have been completed three months prior to the screening visit);
- 6. A body-mass index in the range of 18–35 kg/m<sup>2</sup>;
- 7. A post-bronchodilator forced expiratory volume in 1 second (FEV<sub>1</sub>) ≥30% and ≤70% of the patient normal predicted value and a post-bronchodilator FEV<sub>1</sub>/forced vital capacity (FVC) ratio <0.70 measured 10–15 minutes after 400 µg (4 puffs x 100 µg) of salbutamol via pressurised metered-dose inhaler pMDI. If this criterion was not met at screening, the test was repeated once before the randomisation visit;
- 8. Patients must have been receiving daily maintenance with triple therapy (inhaled corticosteroid [ICS] plus long-acting muscarinic antagonist [LAMA] plus long-acting β<sub>2</sub>-agonist [LABA]) at a stable dose and dosing regimen for at least two months prior to screening;

9. A history of chronic bronchitis defined as chronic cough and sputum production for more than three months per year for two or more years and known as a 'spontaneous sputum producer';
10. At screening, patients must have been able to produce an adequate induced sputum sample defined as a load of at least 300 mg with a viability factor of not less than 70% (with less than 30% epithelial cells) and a neutrophil % differential count of at least 60%. The patients may have been re-challenged once, if the first sputum sample did not meet these criteria;
11. Patients must have been symptomatic at screening, defined as having a COPD Assessment Test score  $\geq 10$ ;
12. Patients had to be able to be trained to use the DPI inhalers (NEXThaler<sup>®</sup>) correctly and to generate sufficient peak inspiratory flow (PIF) (at least 40 L/minute) using the In-Check Dial<sup>®</sup> device;
13. A cooperative attitude and ability to perform the required outcome measurements (e.g. spirometry testing, induced sputum, and other analyses).

### ***Exclusion Criteria***

The presence of any of the following excluded a patient from study enrolment:

1. Pregnant or lactating women;
2. Patients with a current diagnosis of asthma;
3. Patients with a moderate or severe COPD exacerbation (i.e. resulting in the use of systemic [oral/intravenous [IV]/intramuscular [IM] corticosteroids] and/or antibiotics or in hospitalisation) or a lower respiratory tract infection within 6 weeks prior to study entry or during the screening period;
4. Patients on maintenance bronchodilators therapy only (LABA alone, LAMA alone, dual LABA/LAMA alone) or maintenance dual therapy only (ICS/LABA or ICS plus LAMA) within two months prior to study entry;
5. Patients on phosphodiesterase (PDE) 4 inhibitors (e.g. roflumilast) within two months prior to study entry;

6. Patients requiring long-term (at least 12 hours daily) oxygen therapy for chronic hypoxemia;
7. Patients participating in a pulmonary rehabilitation program or completing such a program within the last six weeks prior to study entry;
8. Patients with known respiratory disorders other than COPD that in the Investigator's opinion would affect efficacy and safety evaluation or place the patient at risk. This included, but was not limited to, known  $\alpha$ -1 antitrypsin deficiency, active tuberculosis, bronchiectasis, sarcoidosis, lung fibrosis, pulmonary hypertension and interstitial lung disease;
9. Patients with lung cancer or a history of lung cancer;
10. Patients with active cancer or a history of cancer (other than lung) with less than five years disease-free survival time (whether there was evidence of local recurrence or metastases or not). Localised carcinoma (e.g. basal cell carcinoma [without metastases], in situ carcinoma of the cervix adequately treated) was acceptable;
11. Patients with a known history of hypersensitivity to  $\beta_2$ -agonist, PDE4 inhibitors or any of the excipients contained in any of the formulations used in the study;
12. Patients with a diagnosis of depression associated with suicidal ideation or behaviour or with a diagnosis of generalised anxiety disorder that in the Investigator's opinion would place the patient at risk;
13. Patients who had known history of clinically significant (CS) cardiovascular conditions such as, but not limited to, unstable or acute ischemic heart disease within one year prior to study entry, New York Heart Association Class III/IV heart failure, known history of sustained and non-sustained cardiac arrhythmias or history of atrial fibrillation diagnosed in the last 6 months prior to study entry and not controlled with therapy rate control strategy;
14. Patients who had CS abnormal 12-lead ECG that, in the Investigator's opinion, would affect efficacy or safety evaluation or place the patient at risk;

15. Male patients with a Fridericia-corrected time interval between the Q and T waves (QT) (QTcF) > 450 ms and female patients with a QTcF > 470 ms at screening and/or at randomisation visits;
16. Patients with a history or symptoms of significant neurological disease including transient ischemic attack, stroke, seizure disorder or behavioural disturbances;
17. Patients with unstable concurrent disease: e.g. uncontrolled hyperthyroidism; uncontrolled diabetes mellitus or other endocrine disease; significant hepatic impairment; significant renal impairment; history of cerebrovascular disease; uncontrolled gastrointestinal disease (e.g. active peptic ulcer, Crohn's disease, ulcerative colitis, enteritis, unexplained diarrhoea, bloody or loose stools); uncontrolled haematological disease; uncontrolled autoimmune disorders (e.g. rheumatoid arthritis, inflammatory bowel disease) or other disease or condition that might, in the judgement of the Investigator, place the patient at undue risk or potentially compromise the results or interpretation of the study;
18. Patients with CS laboratory abnormalities indicating a significant or unstable concomitant disease that might, in the judgement of the Investigator, place the patient at undue risk or potentially compromise the results or interpretation of the study;
19. Patients with abnormal alanine aminotransferase (ALT)  $\geq 2x$  upper limit of normal (ULN) and/or aspartate aminotransferase (AST)  $\geq 2x$  ULN and/or bilirubin  $\geq 1.5x$  ULN. Isolated bilirubin  $\geq 1.5x$  ULN was acceptable if fractionated and direct bilirubin was <35%;
20. Current or chronic history of liver disease, or known hepatic or biliary abnormalities (except for Gilbert's syndrome or asymptomatic gallstones);
21. Patients receiving treatment with any drug known to have a well-defined potential for hepatotoxicity (e.g. isoniazid, nimesulide, ketoconazole) within the previous three months prior to study entry and during the screening period;
22. Patients who experienced excessive weight loss recently (which could not be explained by the natural course of COPD or known background conditions);

23. Patients with a history of alcohol abuse and/or substance/drug abuse within 12 months prior to the screening visit;
24. Patients that received any other investigational drug within the preceding 30 days (60 days for biologics), or a longer and more appropriate time as determined by the Investigator (e.g. approximately five half-lives of the previous investigational drug).

### ***Sputum collection and processing for RNA assessments***

Sputum samples were collected by sputum induction, with patients breathing in nebulised hypertonic saline at increasing concentrations (3%, then 4% and finally 5%) while wearing a nose clip.

All solid or dense-looking material was collected from the clear salivary fluid into a stainless steel Petri dish lid. Sputum plugs were then gathered and condensed into one mass. After cleaning the Petri dish, cold Dulbecco's Phosphate-Buffered Saline equal to eight times the weight of the sputum plug was added, then dispersed, mixed and vortexed for 15 sec, before gently agitating on a rolling mixer or rocker for 15 min at room temperature. The resulting mixture was centrifuged at 790 g for 10 min at 4C. A volume of the supernatant equal to four times the weight of the sputum plug was replaced with an equivalent volume of Sputolysin 0.2% and gently agitated on a rolling mixer or rocker for 15 min at room temperature. The resulting cell suspension was filtered, with the filtrate centrifuged at 790 g for 10 min at 4C, and the supernatant was removed. The pellet was re-suspended in cold Dulbecco's Phosphate-Buffered Saline for total and differential cell count, centrifuged at 400g for 10 minutes at 4C and re-suspend again in TRIzol to give approximately  $1 \times 10^6$  cells for 1mL of TRIzol for RNA assessment. The resulting suspension were stored immediately in an upright position at -80°C until shipment to the laboratory on dry ice for RNA extraction and microarray analysis.

### ***Blood collection and processing for RNA assessment***

Blood was collected in BD Vacutainer™ PAXgene™ Blood RNA tubes suitable for storage and transportation of whole blood that requires intracellular RNA stabilisation. Empty PAXgene tubes were stored at nominally +4C and kept upright at room temperature (+18C to +25C) for a minimum of 2 hours and a maximum of 72 hours prior to use. A few mL of blood were discarded from the catheter prior to drawing blood into the PAXgene Blood RNA. After collection tubes were inverted 8-10 times and stored into a –20C freezer for at least 24 hours and then transferred into a –80C freezer until shipment to be bioanalytical lab in dry ice where they were stored at –80C until RNA extraction and analysis.

### ***RNA extraction and amplification***

RNA was extracted from the Sputum TRIzol/lysate using a standard phenol/chloroform extraction method. This method combines a robust lysis/denaturant extraction with ethanol precipitation for recovery of high-quality total RNA. The crude RNA was further purified by incubation with DNaseI (Qiagen, Hilden, Germany) followed by filter purification using the QIAgen RNeasy MinElute spin column (Qiagen, Hilden, Germany) to yield pure RNA.

RNA was extracted from the blood samples using the PAXgene™ Blood RNA Kit on the automated QIASymphony SP module (Qiagen, Hilden, Germany). Blood samples were left to thaw at room temperature for at least 2 h before commencing the RNA extraction protocol. Following equilibration at room temperature, samples were centrifuged to pellet the nucleic acids. The pellets were re-suspended and incubated with Proteinase K in a buffer containing guanidine-isothiocyanate. The samples were inserted in the QIASymphony SP module (Qiagen, Hilden, Germany) where the RNA



was purified using magnetic particle processing. Following elution the RNA was heat denatured at 65C.

The extracted RNA samples were then assessed for concentration and purity using the Nanodrop 1000 spectrophotometer (Thermo Fisher Scientific, Massachusetts, USA). Quality was assessed using the Agilent Bioanalyser 2100 system (Agilent, Santa Clara, USA). RNA samples were reverse transcribed and amplified using the NuGEN™ Ovation™ RNA Amplification System V2 (NuGen Technologies, Redwood City, California) in combination with the Ovation™ Whole Blood Solution, and quality assessed again. The amplified ssDNA was then fragmented and labelled using the NuGEN Encore Biotin Module (NuGen Technologies, Redwood City, California), before being hybridised onto Affymetrix GeneChip® (Human Plus 2.0) arrays (Thermo Fisher Scientific, Santa Clara, California).

### ***Sample profiling***

All samples with sufficient quality (two identifiable peaks at 18S and 28S) and quantity (sputum 20 ng input and blood 50 ng input) of RNA were profiled on Affymetrix U133 Plus 2.0 microarrays. Prior to profiling, samples were randomised into batches for microarray analysis (amplification and array lot) according to available clinical and technical factors (centre, date of test, stage, treatment period and sex)

### ***Microarray data quality control and pre-processing***

Probe-level intensity measurements (CEL files) were background corrected, normalised and summarised as expression measurements using Robust Multichip Algorithm (RMA) [1] within each dataset (blood, sputum) separately. Data quality control was performed using Affymetrix GeneChip QC parameters, array image quality analysis and distribution analyses, according to Almac Diagnostic Services

QC pipeline. Surface artefacts were identified by modelling the expected variation in signal intensity over the array in order to find areas of unexpectedly high deviation; outlying Gene Chip QC parameters were identified using absolute deviation from the measure of central tendency; samples with outlying intensity profiles were identified using PCA (Hotelling T2 and Residual Q). Before further analysis, samples that passed quality assessment were pre-processed again using RMA. The data were subsequently filtered to remove any uninformative transcripts (lowly expressed, invariant probe sets). Probe sets were removed using a background variance measure defined from the data.

In advance of identification of differentially expressed genes, as part of the data quality assessment, the impact of RNA-integrity number (RIN) on resultant data was observed. Although sample selection for profiling included selection of samples with RINs within the tolerance of the amplification system, it was considered pertinent to confirm that the resulting data quality was not influenced by variability in sample degradation within the cohort. The profiling chemistry and array platform are designed to maximise amplification & measurement of transcripts present within the sample, and the aim of the data normalisation is to minimise variation due to differences in input quantity. However, despite best attempts to generate comparable data, stark differences in input sample quality will cause differences in resulting data quality. Percentage present call is a measure of detection rate of transcripts targeted by the probe sets on the microarray; it is the primary measure of data quality and is reflective of sample quality. In this cohort, no relationship between RIN and percentage present call was found (figure provided if required, correlation may be sufficient).

***Exclusion of probe sets with statistically significantly different pre-dose expression between treatment periods***

An ANOVA model was fitted to identify probe sets with statistically significantly different pre-dose expression between treatment periods, with pre-dose expression as dependent variable, and subject, period and treatment as independent variables.

In case of significant differences (pFDR <0.05 for the comparisons between CHF6001 doses and placebo), the probe set was excluded from further analysis.

**Results**

**Total and differential cell count in sputum**

*Figure S1. Change from baseline (average of Day 20, 26 and 32) geometric means ratio of CHF6001 relative to placebo for total cell count, and absolute and relative differential cell counts in sputum (analysed population).*

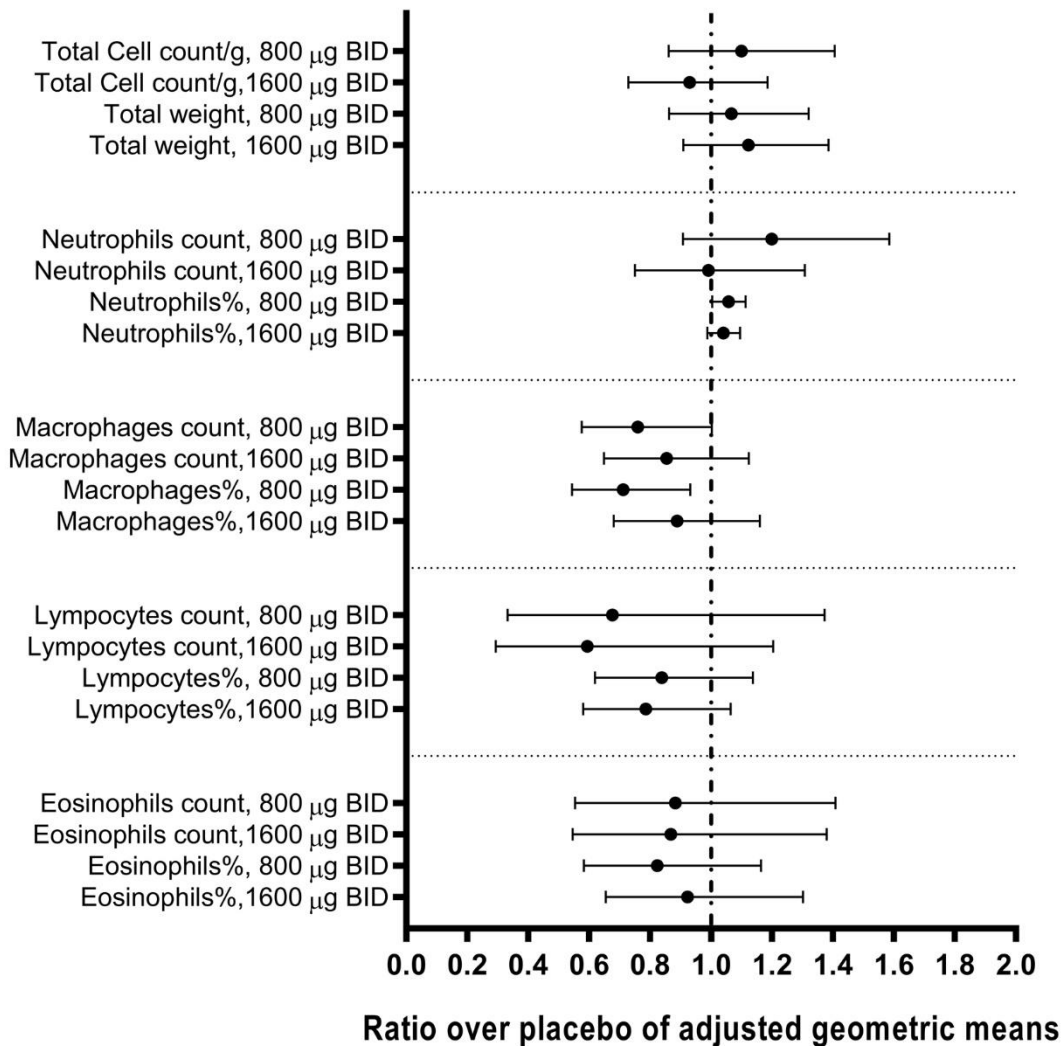

Abbreviations: BID, twice daily. Data are the ratios of geometric means and 95% CI.

**Samples**

Following quality and RNA quantity assessment in blood, 51 post-dose samples for placebo, 54 for CHF6001 800 µg BID, and 55 for CHF6001 1600 µg BID were available for analysis. Among the pre-dose samples considered for analysis, six for placebo, six for CHF6001 800 µg BID and 10 for CHF6001 1600 µg BID did not

match the corresponding post-dose of the same periods. Overall, pre- to post-dose samples for active and placebo were available from 50 patients for both CHF6001 treatments.

Following quality and RNA quantity assessment in sputum, 43 post-dose samples (33 on Day 32 and 10 on Day 26) were available for placebo, 41 samples (30 on Day 32, seven on Day 26, and four on Day 21) were available for CHF6001 800 µg BID and 41 samples (35 on Day 32, five on Day 26, and one on Day 21) were available for CHF6001 1600 µg BID. Among the pre-dose samples, 13 for placebo, six for CHF6001 800 µg BID and three for 1600 µg BID did not match the corresponding post-dose of the same periods. Overall, pre- to post-dose samples for active and placebo were available from 37 patients for CHF6001 800 µg BID and 41 patients for CHF6001 1600 µg BID.

***Principal component analysis on pre-dose samples***

Analysis of principal components on pre-dose samples both in blood and sputum (Figure S2).

Figure S2. PCA image of all sputum (A, B) and blood (C, D) pre-dose samples, coloured by period (A, C) or by treatment (B, D)

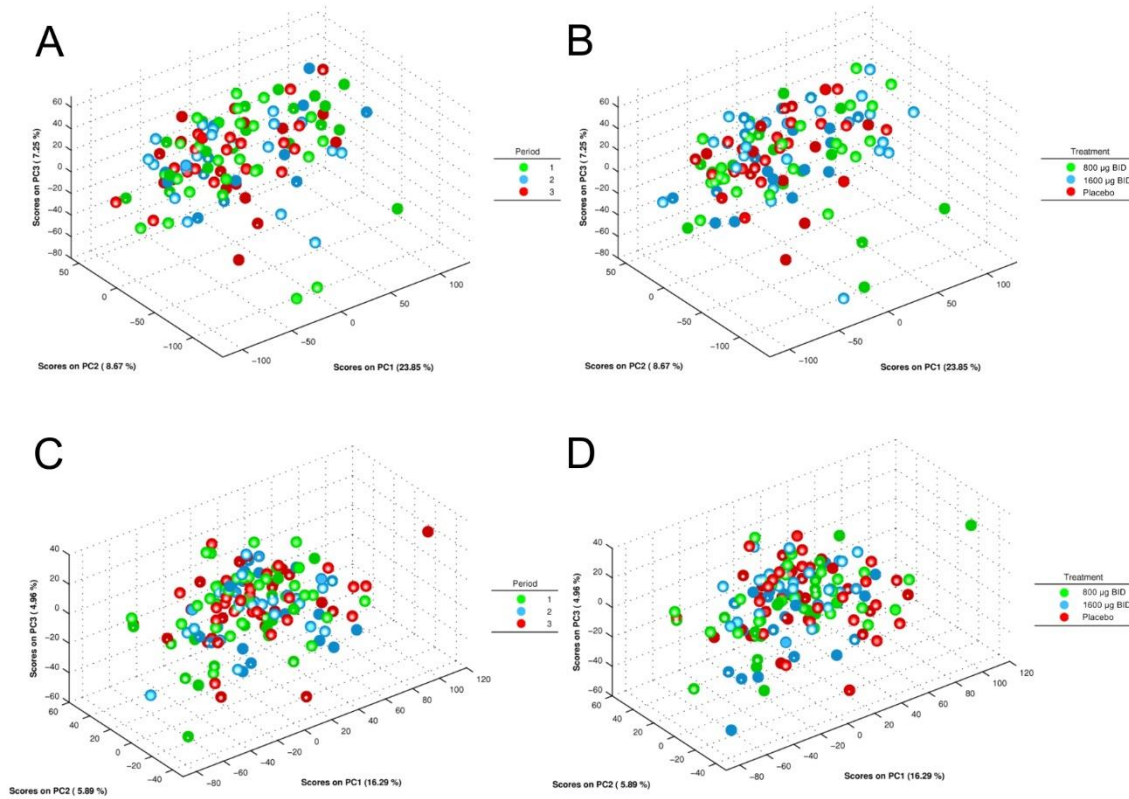

### **Microarray data quality control and pre-processing**

More than 54,000 probe sets were considered, corresponding to approximately 21,000 genes coding for proteins. Filtering to remove any uninformative transcripts (low expression, invariant probe sets) using a background variance of 3.49 for blood and 3.60 for sputum resulted in 45,163 and 44,355 reliably detected probe sets in blood and sputum, respectively, available for analysis.

**Functional enrichment analysis**

*Table S1: Canonical pathways significantly modulated by CHF6001. \*Associated with the pathophysiology of COPD; †Probability adjusted for multiple test correction of a random gene set this size to co-concur on this group; ‡Molecules from the Gene list that are annotated to the functional group*

| Ingenuity canonical pathways                        | Association with COPD* | CHF6001 800 µg BID |                                                                                                   | CHF6001 1600 µg BID |                                                                                                                                                 |
|-----------------------------------------------------|------------------------|--------------------|---------------------------------------------------------------------------------------------------|---------------------|-------------------------------------------------------------------------------------------------------------------------------------------------|
|                                                     |                        | p-value (FDR)†     | Genes‡                                                                                            | p-value (FDR)*      | Genes‡                                                                                                                                          |
| Macropinocytosis signalling                         | [2]                    | 0.0324             | PDGFB, PDGFA, PIK3CG, ITGB7, SRC, KL, PRKCZ, ANKFY1, HGF                                          | 0.0417              | PDGFB, PLCG2, PDGFA, IRS2, CSF1, PIK3CG, KL, PRKCZ, PAK1                                                                                        |
| Platelet-derived growth factor (PGDF) signalling    | [3]                    | 0.0324             | PDGFB, SPHK1, PDGFA, INPP5D, PIK3CG, MAP2K4, SRC, KL, SYNJ2                                       | 0.0038              | PDGFB, PLCG2, PDGFA, IRS2, SYNJ1, JUN, INPP5D, PIK3CG, SOS2, MAP2K4, RASA1, KL, STAT3                                                           |
| Relaxin Signalling                                  | [4]                    | 0.0324             | GNG2, PDE4D, PDE4B, PIK3CG, PRKAR1A, GNAT2, KL, PRKCZ, PDE7A, PDE2A, BRAF, GNB5                   | 0.0117              | PDE4D, JUN, PDE4B, PIK3CG, PRKAR1A, KL, GNG4, BRAF, GNB5, GNG2, IRS2, GNAI3, GNAT2, PRKCZ, PDE7A, PDE2A                                         |
| Hepatic fibrosis / hepatic stellate cell activation |                        | 0.0324             | PDGFB, IL-1RL2, PDGFA, BCL2, IGF1R, IL-18RAP, EDN1, MYH10, SERPINE1, IL-1RL1, COL1A1, IL-1R1, HGF | 0.0038              | IL-1RL2, IL-18RAP, MYH10, TLR4, IL-4R, COL1A1, CCL5, COL15A1, MMP1, PDGFB, PDGFA, CSF1, IGF1R, EDN1, IL-1A, FAS, SERPINE1, IL-1RL1, IL-1R1, TNF |
| Vitamin D receptor (VDR)/RXR activation             | [5–7]                  | 0.0324             | VDR, RXRA, PDGFA, CST6, CDKN1B, CYP27B1, PRKCZ, IL-1RL1                                           | 0.0339              | SERPINE1, PDGFA, CST6, CDKN1B, CYP27B1, TNFSF11, PRKCZ, IL-1RL1, CCL5                                                                           |

| Ingenuity canonical pathways                                                                                      | Association with COPD* | CHF6001 800 µg BID |                                                                                                               | CHF6001 1600 µg BID |                                                                                                                                                                |
|-------------------------------------------------------------------------------------------------------------------|------------------------|--------------------|---------------------------------------------------------------------------------------------------------------|---------------------|----------------------------------------------------------------------------------------------------------------------------------------------------------------|
|                                                                                                                   |                        | p-value (FDR)†     | Genes‡                                                                                                        | p-value (FDR)*      | Genes‡                                                                                                                                                         |
| Signal transducer and activator of transcription 3 (STAT3) pathway                                                | [8]                    | 0.0324             | PDGFB, BCL2, IL-27RA, IGF1R, MAP2K4, SOCS3, SRC, HGF, BMP6                                                    | NS                  |                                                                                                                                                                |
| Phosphatidylinositol 3,4,5-trisphosphate 3-phosphatase and dual-specificity protein phosphatase (PTEN) signalling | [9]                    | 0.0324             | CNKS3, BCL2, IGF1R, INPP5D, PIK3CG, BCL2L11, CASP9, CDKN1B, PRKCZ, SYNJ2                                      | NS                  |                                                                                                                                                                |
| G-protein coupled receptor signalling                                                                             | [10]                   | 0.0331             | PDE4D, DUSP4, PDE4B, PIK3CG, PRKAR1A, MAP3K8, DUSP6, PTGIR, KL, BRAF, CXCR2, HTR2B, SRC, PDE7A, PDE2A, PTGER2 | 0.0162              | PDE4D, DUSP4, PDE4B, PIK3CG, PRKAR1A, MAP3K8, SOS2, FPR2, DUSP6, KL, BRAF, RGS18, ADORA2A, IRS2, FPR1, GNAI3, CXCR2, RASA1, PDE7A, PDE2A, STAT3, PLCB1, PTGER2 |
| 1D-myo-inositol Hexakisphosphate Biosynthesis II (mammalian)                                                      | [3]                    | 0.0331             | INPP5A, INPP5D, IPMK, SYNJ2                                                                                   | NS                  |                                                                                                                                                                |



| Ingenuity canonical pathways                                                 | Association with COPD* | CHF6001 800 µg BID |                                                                                                        | CHF6001 1600 µg BID |                                                                                                                                                                    |
|------------------------------------------------------------------------------|------------------------|--------------------|--------------------------------------------------------------------------------------------------------|---------------------|--------------------------------------------------------------------------------------------------------------------------------------------------------------------|
|                                                                              |                        | p-value (FDR)†     | Genes‡                                                                                                 | p-value (FDR)*      | Genes‡                                                                                                                                                             |
| D-myo-inositol (1,3,4)-triphosphate biosynthesis                             | [3]                    | 0.0331             | INPP5A, INPP5D, IPMK, SYNJ2                                                                            | NS                  |                                                                                                                                                                    |
| Cyclic adenosine monophosphate (cAMP)-mediated signalling                    | [11,12]                | 0.0331             | PDE4D, DUSP4, PDE4B, PRKAR1A, CXCR2, DUSP6, PTGIR, SRC, PDE7A, AKAP12, PDE2A, PTGER2, CREM, BRAF       | 0.0145              | PDE4D, DUSP4, PDE4B, PRKAR1A, FPR2, DUSP6, AKAP12, AKAP13, CREM, BRAF, RGS18, ADORA2A, FPR1, GNAI3, CXCR2, PDE7A, PDE2A, STAT3, PTGER2, CAMK1                      |
| Small cell lung cancer signalling                                            |                        | 0.0331             | KL, TFDP1, RXRA, BCL2, PIK3CG, CCNE2, CASP9, CDKN1B                                                    | NS                  |                                                                                                                                                                    |
| Role of osteoblasts, osteoclasts and chondrocytes in rheumatoid arthritis    |                        | 0.0355             | IL-1RL2, MMP14, BCL2, PIK3CG, IL-18RAP, IL-18R1, MAP2K4, CASP9, KL, SRC, IL-1RL1, COL1A1, IL-1R1, BMP6 | 0.0038              | IL-1RL2, JUN, IL-18, PIK3CG, IL-18RAP, KL, ALPL, TNFSF11, NFATC2, COL1A1, SMAD9, MMP1, BMP6, IRS2, CSF1, MAP2K4, IL-18R1, IL-1A, DKK2, SFRP1, IL-1RL1, IL-1R1, TNF |
| Human epidermal growth factor receptor 2 (HER-2) signalling in breast cancer |                        | 0.0355             | KL, PRKCZ, AREG, PIK3CG, CCNE2, ITGB7, CASP9, CDKN1B                                                   | NS                  |                                                                                                                                                                    |

| Ingenuity canonical pathways                      | Association with COPD* | CHF6001 800 µg BID |                                                                                      | CHF6001 1600 µg BID |                                                                                                               |
|---------------------------------------------------|------------------------|--------------------|--------------------------------------------------------------------------------------|---------------------|---------------------------------------------------------------------------------------------------------------|
|                                                   |                        | p-value (FDR)†     | Genes‡                                                                               | p-value (FDR)*      | Genes‡                                                                                                        |
| IL-10 signalling                                  | [13]                   | 0.0355             | SOCS3, IL-1RL2, IL-1RL1, IL-18RAP, MAP2K4, IL-1R1, FCGR2A                            | <0.0001             | IL-1RL2, JUN, IL-18, IL-18RAP, MAP2K4, FCGR2A, IL-1A, CCR1, SOCS3, IL-4R, IL-1RL1, MAP4K4, STAT3, IL-1R1, TNF |
| Myc mediated apoptosis signalling                 |                        | 0.0363             | KL, PRKCZ, BCL2, IGF1R, PIK3CG, MAP2K4, CASP9                                        | 0.0490              | IRS2, IGF1R, PIK3CG, SOS2, MAP2K4, KL, PRKCZ, FAS                                                             |
| Hepatic cholestasis                               |                        | 0.0363             | IL-1RL2, RXRA, IL-12B, ABCB4, IL-18RAP, PRKAR1A, MAP2K4, PRKCZ, IL-1RL1, OSM, IL-1R1 | 0.0240              | IL-1RL2, IL-12B, ABCB4, JUN, IL-18, IL-18RAP, PRKAR1A, MAP2K4, IL-1A, RARA, TLR4, PRKCZ, IL-1RL1, IL-1R1, TNF |
| PPAR signalling                                   | [14]                   | 0.0363             | PDGFB, STAT5B, IL-1RL2, RXRA, PDGFA, IL-1RL1, IL-18RAP, IL-1R1                       | 0.0038              | STAT5B, PDGFB, IL-1RL2, PDGFA, JUN, IL-18, IL-18RAP, SOS2, IL-1A, IL-1RL1, MAP4K4, IL-1R1, TNF                |
| Cysteine biosynthesis III (mammalian)             | [15]                   | 0.0363             | CTH, MAT2A, EEF1AKMT3, NSUN4                                                         | NS                  |                                                                                                               |
| Antiproliferative role of somatostatin receptor 2 |                        | 0.0372             | GNG2, KL, SRC, PIK3CG, BRAF, CDKN1B, GNB5                                            | NS                  |                                                                                                               |

| Ingenuity canonical pathways                                                   | Association with COPD* | CHF6001 800 µg BID |                                                                                                                        | CHF6001 1600 µg BID |                                                                                                                                                                                                                                   |
|--------------------------------------------------------------------------------|------------------------|--------------------|------------------------------------------------------------------------------------------------------------------------|---------------------|-----------------------------------------------------------------------------------------------------------------------------------------------------------------------------------------------------------------------------------|
|                                                                                |                        | p-value (FDR)†     | Genes‡                                                                                                                 | p-value (FDR)*      | Genes‡                                                                                                                                                                                                                            |
| Tec kinase signalling                                                          | [16]                   | 0.0398             | STAT5B, GNG2, TNFRSF10B, PIK3CG, MAP2K4, GNAT2, SRC, KL, PRKCZ, BMX, GNB5                                              | <0.0001             | LCK, STAT4, PIK3CG, FNBP1, TLR4, KL, RHOF, PAK1, BMX, GNG4, GNB5, STAT5B, TNFRSF21, GNG2, PLCG2, IRS2, MAP2K4, GNAI3, GNAT2, RHOU, FAS, PRKCZ, STAT3, TNF                                                                         |
| Superpathway of D-myoinositol (1,4,5)-trisphosphate metabolism                 | [3]                    | 0.0437             | INPP5A, INPP5D, IPMK, SYNJ2                                                                                            | NS                  |                                                                                                                                                                                                                                   |
| Role of macrophages, fibroblasts and endothelial cells in rheumatoid arthritis |                        | 0.0457             | IL-1RL2, PIK3CG, IL-18RAP, IL-32, KL, SOCS3, PDGFB, PDGFA, MAP2K4, IL-18R1, TNFSF13B, SRC, PRKCZ, IL-1RL1, OSM, IL-1R1 | 0.0003              | IL-1RL2, IL-18, JUN, IL-18RAP, PIK3CG, IL-32, TLR4, KL, SOCS3, TNFSF11, NFATC2, CCL5, MMP1, PLCG2, PDGFB, PDGFA, CSF1, IRS2, CEBPD, TNFSF13B, MAP2K4, LTB, IL-18R1, IL-1A, PRKCZ, DKK2, SFRP1, IL-1RL1, STAT3, PLCB1, IL-1R1, TNF |
| Role of JAK family kinases in IL-6-type cytokine signalling                    | [17]                   | 0.0468             | STAT5B, SOCS3, OSM, MAP2K4                                                                                             | NS                  |                                                                                                                                                                                                                                   |

| Ingenuity canonical pathways                                        | Association with COPD* | CHF6001 800 µg BID         |                    | CHF6001 1600 µg BID |                                                                                                                                                              |
|---------------------------------------------------------------------|------------------------|----------------------------|--------------------|---------------------|--------------------------------------------------------------------------------------------------------------------------------------------------------------|
|                                                                     |                        | p-value (FDR) <sup>†</sup> | Genes <sup>‡</sup> | p-value (FDR)*      | Genes <sup>‡</sup>                                                                                                                                           |
| Th1 and Th2 activation pathway                                      | [13,18]                | NS                         |                    | 0.0004              | JUN, IL-18, STAT4, PIK3CG, CRLF2, KL, SOCS3, IL-4R, TNFSF11, NFATC2, STAT5B, CD3E, IL-12B, IL-27RA, IRS2, IL-18R1, CCR1, CD3G, NFIL-3, KLRD1, IL-1RL1, STAT3 |
| IL-6 signalling                                                     | [13]                   | NS                         |                    | 0.0008              | IL-1RL2, MCL1, JUN, IL-18, PIK3CG, IL-18RAP, SOS2, KL, SOCS3, COL1A1, IRS2, MAP2K4, IL-1A, IL-1RL1, STAT3, MAP4K4, IL-1R1, TNF                               |
| C-C chemokine receptor type 5 (CCR5) signalling in macrophages      | [19]                   | NS                         |                    | 0.0019              | PLCG2, GNG2, CD3E, JUN, GNAI3, MAP2K4, CD3G, FAS, PRKCZ, CCL3, CCL5, GNG4, CCL4, GNB5                                                                        |
| Triggering receptor expressed on myeloid cells 1 (TREM1) signalling | [20]                   | NS                         |                    | 0.0025              | STAT5B, PLCG2, IL-18, NLRP6, NLRP3, TLR4, CCL3, NOD2, IL-1RL1, STAT3, NLRC4, TNF                                                                             |
| Th1 pathway                                                         | [13]                   | NS                         |                    | 0.0032              | IL-18, STAT4, PIK3CG, KL, SOCS3, TNFSF11, NFATC2, CD3E, IL-12B, IRS2, IL-27RA, IL-18R1, CD3G, NFIL-3, KLRD1, STAT3                                           |

| Ingenuity canonical pathways                                                 | Association with COPD* | CHF6001 800 µg BID |        | CHF6001 1600 µg BID |                                                                                                                                        |
|------------------------------------------------------------------------------|------------------------|--------------------|--------|---------------------|----------------------------------------------------------------------------------------------------------------------------------------|
|                                                                              |                        | p-value (FDR)†     | Genes‡ | p-value (FDR)*      | Genes‡                                                                                                                                 |
| Dendritic cell maturation                                                    | [21]                   | NS                 |        | 0.0038              | IL-1RL2, IL-18, STAT4, PIK3CG, IL-32, FSCN1, TLR4, KL, COL1A1, PLCG2, IL-12B, IRS2, MAP2K4, CD1B, LTB, IL-1A, FCGR2A, CD1A, PLCB1, TNF |
| Hepatocyte growth factor (HGF) signalling                                    | [22]                   | NS                 |        | 0.0038              | PLCG2, RAPGEF1, IRS2, JUN, PIK3CG, MAP3K8, SOS2, MAP2K4, KL, PRKCZ, PAK1, STAT3, MAP3K2, ELF2, MAP3K13                                 |
| Inflammasome pathway                                                         | [23]                   | NS                 |        | 0.0038              | IL-18, NOD2, NLRC4, NLRP3, P2RX7, TLR4                                                                                                 |
| Role of pattern recognition receptors in recognition of bacteria and viruses | [24,25]                | NS                 |        | 0.0038              | PLCG2, IL-12B, IRS2, IL-18, PIK3CG, MAP2K4, RNASEL, NLRP3, IL-1A, TLR4, KL, PRKCZ, NOD2, CCL5, NLRC4, TNF                              |
| Natural killer cell signalling                                               | [26,27]                | NS                 |        | 0.0038              | KIR2DL4, PLCG2, LCK, IRS2, SYNJ1, PIK3CG, INPP5D, SOS2, FCGR2A, KL, KLRD1, PRKCZ, KIR2DL2, PAK1, KLRB1                                 |

| Ingenuity canonical pathways                                                  | Association with COPD* | CHF6001 800 µg BID         |                    | CHF6001 1600 µg BID |                                                                                                                                                                                                                                  |
|-------------------------------------------------------------------------------|------------------------|----------------------------|--------------------|---------------------|----------------------------------------------------------------------------------------------------------------------------------------------------------------------------------------------------------------------------------|
|                                                                               |                        | p-value (FDR) <sup>†</sup> | Genes <sup>‡</sup> | p-value (FDR)*      | Genes <sup>‡</sup>                                                                                                                                                                                                               |
| Molecular mechanisms of cancer                                                |                        | NS                         |                    | 0.0038              | ARHGEF10, RAPGEF1, E2F7, PIK3CG, PRKAR1A, BCL2L11, SOS2, CDKN1B, AURKA, GAB2, BRAF, BMP6, IRS2, GNAI3, GNAT2, RALB, TFDP1, PRKCZ, PLCB1, JUN, FNBP1, KL, CDK16, PAK1, RHOF, CDK17, PRKDC, SMAD9, MAP2K4, CCNE2, RASA1, RHOU, FAS |
| Breast cancer regulation by stathmin1                                         |                        | NS                         |                    | 0.0041              | PPP1CB, ARHGEF10, E2F7, PIK3CG, PRKAR1A, SOS2, CDKN1B, KL, PAK1, GNG4, PPP2R2A, GNB5, GNG2, TUBA4A, IRS2, CCNE2, GNAI3, PRKCZ, PLCB1, PPP2R5C, CAMK1                                                                             |
| Granulocyte adhesion and diapedesis                                           | [28]                   | NS                         |                    | 0.0049              | IL-1RL2, MMP12, IL-18, IL-18RAP, FPR2, CCL5, MMP1, CCL4, FPR1, GNAI3, CXCR2, IL-1A, MMP7, CXCL6, CCL3, IL-1RL1, IL-1R1, TNF                                                                                                      |
| Role of hypercytokinaemia/hyperchemokinaemia in the pathogenesis of influenza |                        | NS                         |                    | 0.0065              | IL-12B, IL-18, IL-1A, CCR1, CCL3, CCL5, CCL4, TNF                                                                                                                                                                                |

| Ingenuity canonical pathways                                                                       | Association with COPD* | CHF6001 800 µg BID |        | CHF6001 1600 µg BID |                                                                                                                                             |
|----------------------------------------------------------------------------------------------------|------------------------|--------------------|--------|---------------------|---------------------------------------------------------------------------------------------------------------------------------------------|
|                                                                                                    |                        | p-value (FDR)†     | Genes‡ | p-value (FDR)*      | Genes‡                                                                                                                                      |
| Cholecystokinin/gastrin-mediated signalling                                                        |                        | NS                 |        | 0.0065              | JUN, IL-18, FNBP1, SOS2, MAP2K4, IL-1A, RHOA, MEF2D, PRKCZ, RHOF, PLCB1, CREM, TNF                                                          |
| Differential regulation of cytokine production in intestinal epithelial cells by IL-17A and IL-17F |                        | NS                 |        | 0.0065              | IL-12B, CCL3, CCL5, IL-1A, TNF, CCL4                                                                                                        |
| Pathogenesis of multiple sclerosis                                                                 |                        | NS                 |        | 0.0066              | CCL3, CCL5, CCL4, CCR1                                                                                                                      |
| Osteoarthritis pathway                                                                             |                        | NS                 |        | 0.0078              | IL-1RL2, MMP12, IL-18RAP, HDAC4, SIK3, P2RX7, TLR4, ALPL, S1PR2, SMAD9, MMP1, MTF1, PRG4, CXCR2, DDIT4, TIMP3, IL-1RL1, PRKAB1, IL-1R1, TNF |
| High mobility group box 1 (HMGB1) signalling                                                       | [29]                   | NS                 |        | 0.0083              | IL-12B, IRS2, JUN, IL-18, PIK3CG, FNBP1, MAP2K4, IL-1A, RHOA, TLR4, KL, SERPINE1, RHOF, IL-1R1, TNF                                         |
| Role of nuclear factor of activated T-cells (NFAT) in regulation of the immune response            | [30]                   | NS                 |        | 0.0083              | LCK, JUN, PIK3CG, SOS2, KL, NFATC2, GNG4, GNB5, GNG2, PLCG2, CD3E, IRS2, GNAI3, GNAT2, FCGR2A, CD3G, MEF2D, PLCB1                           |

| Ingenuity canonical pathways                                                      | Association with COPD* | CHF6001 800 µg BID |        | CHF6001 1600 µg BID |                                                                                                                                    |
|-----------------------------------------------------------------------------------|------------------------|--------------------|--------|---------------------|------------------------------------------------------------------------------------------------------------------------------------|
|                                                                                   |                        | p-value (FDR)†     | Genes‡ | p-value (FDR)*      | Genes‡                                                                                                                             |
| Nuclear factor kappa light chain enhancer of activated B cells (NF-κB) signalling | [31]                   | NS                 |        | 0.0083              | LCK, IL-18, PELI1, PIK3CG, MAP3K8, TLR4, KL, TNFSF11, BRAF, PLCG2, IGF1R, IRS2, TNFSF13B, IL-1A, PRKCZ, MAP4K4, IL-1R1, TNF        |
| Systemic lupus erythematosus signalling                                           |                        | NS                 |        | 0.0087              | LCK, JUN, IL-18, PIK3CG, CD22, SOS2, KL, NFATC2, CREM, PLCG2, CD3E, IRS2, INPP5D, TNFSF13B, IL-1A, FCGR2A, PTPRC, CD3G, TNF        |
| T cell receptor signalling                                                        | [13]                   | NS                 |        | 0.0093              | LCK, CD3E, IRS2, JUN, PIK3CG, SOS2, MAP2K4, RASA1, CD3G, PTPRC, KL, BMX, NFATC2                                                    |
| Production of nitric oxide and reactive oxygen species in macrophages             | [32]                   | NS                 |        | 0.0098              | PPP1CB, JUN, PIK3CG, FNBP1, MAP3K8, NCF1, TLR4, KL, RHOF, MAP3K2, PPP2R2A, PLCG2, IRS2, MAP2K4, RHOU, PRKCZ, PPP2R5C, MAP3K13, TNF |
| Renin-angiotensin signalling                                                      |                        | NS                 |        | 0.0098              | PLCG2, IRS2, JUN, PIK3CG, PRKAR1A, SOS2, MAP2K4, KL, PRKCZ, PAK1, CCL5, STAT3, PTGER2, TNF                                         |



| Ingenuity canonical pathways                                                                          | Association with COPD* | CHF6001 800 µg BID |        | CHF6001 1600 µg BID |                                                                                                                                             |
|-------------------------------------------------------------------------------------------------------|------------------------|--------------------|--------|---------------------|---------------------------------------------------------------------------------------------------------------------------------------------|
|                                                                                                       |                        | p-value (FDR)†     | Genes‡ | p-value (FDR)*      | Genes‡                                                                                                                                      |
| Phospholipase C signalling                                                                            | [3]                    | NS                 |        | 0.0098              | PPP1CB, ARHGEF10, LCK, FNBP1, SOS2, HDAC4, PLD2, RHOF, NFATC2, GNG4, GNB5, GNG2, PLCG2, CD3E, FCGR2A, RALB, CD3G, RHOU, MEF2D, PRKCZ, PLCB1 |
| Differential regulation of cytokine production in macrophages and t helper cells by IL-17A and IL-17F | [33,34]                | NS                 |        | 0.0098              | IL-12B, CCL3, CCL5, TNF, CCL4                                                                                                               |
| IL-8 signalling                                                                                       | [13]                   | NS                 |        | 0.0098              | DEFA1 (includes others), JUN, PIK3CG, FNBP1, KL, PLD2, RHOF, GNG4, BRAF, GNB5, GNG2, IRS2, MAP2K4, GNAI3, CXCR2, CXCR1, RHOU, PRKCZ, MAP4K4 |
| Th2 pathway                                                                                           | [18]                   | NS                 |        | 0.0098              | STAT5B, IL-12B, CD3E, IRS2, JUN, STAT4, PIK3CG, CD3G, CRLF2, CCR1, KL, SOCS3, IL-4R, IL-1RL1, NFATC2                                        |
| IL-3 signalling                                                                                       | [35]                   | NS                 |        | 0.0098              | STAT5B, RAPGEF1, IRS2, JUN, INPP5D, PIK3CG, KL, PRKCZ, PAK1, GAB2, STAT3                                                                    |

| Ingenuity canonical pathways                                                    | Association with COPD* | CHF6001 800 µg BID |        | CHF6001 1600 µg BID |                                                                                                                                                |
|---------------------------------------------------------------------------------|------------------------|--------------------|--------|---------------------|------------------------------------------------------------------------------------------------------------------------------------------------|
|                                                                                 |                        | p-value (FDR)†     | Genes‡ | p-value (FDR)*      | Genes‡                                                                                                                                         |
| Prolactin signalling                                                            | [36]                   | NS                 |        | 0.0098              | STAT5B, PLCG2, IRS2, JUN, PIK3CG, SOS2, SOCS3, KL, PRL, PRKCZ, STAT3                                                                           |
| Cardiac hypertrophy signalling                                                  |                        | NS                 |        | 0.0112              | JUN, PIK3CG, PRKAR1A, FNBP1, MAP3K8, KL, RHOF, MAP3K2, GNG4, GNB5, GNG2, PLCG2, IRS2, IGF1R, MAP2K4, GNAI3, GNAT2, RHOU, MEF2D, PLCB1, MAP3K13 |
| B cell receptor signalling                                                      | [35]                   | NS                 |        | 0.0117              | SYNJ1, JUN, PIK3CG, MAP3K8, CD22, EBF1, SOS2, KL, NFATC2, GAB2, MAP3K2, PLCG2, IRS2, INPP5D, MAP2K4, FCGR2A, PTPRC, MAP3K13                    |
| Stress-activated protein kinase/c-Jun NH2-terminal kinase (SAPK/JNK) signalling | [37]                   | NS                 |        | 0.0117              | GNG2, DUSP4, LCK, IRS2, JUN, PIK3CG, SOS2, MAP2K4, KL, MAP4K4, MAP3K2, MAP3K13                                                                 |
| Ephrin receptor signalling                                                      |                        | NS                 |        | 0.0135              | RAPGEF1, PIK3CG, SOS2, PAK1, GNG4, GNB5, GNG2, PDGFB, PDGFA, GNAI3, GNAT2, RASA1, EFNA1, ITSN1, MAP4K4, STAT3, EFNB2                           |

| Ingenuity canonical pathways                                 | Association with COPD* | CHF6001 800 µg BID |        | CHF6001 1600 µg BID |                                                                                                                                      |
|--------------------------------------------------------------|------------------------|--------------------|--------|---------------------|--------------------------------------------------------------------------------------------------------------------------------------|
|                                                              |                        | p-value (FDR)†     | Genes‡ | p-value (FDR)*      | Genes‡                                                                                                                               |
| Thrombopoietin signalling                                    | [38]                   | NS                 |        | 0.0170              | STAT5B, PLCG2, IRS2, JUN, PIK3CG, KL, PRKCZ, GAB2, STAT3                                                                             |
| G Protein signalling mediated by tubby                       |                        | NS                 |        | 0.0170              | GNG2, PLCG2, LCK, PLCB1, GNG4, GNB5                                                                                                  |
| Altered T cell and B cell signalling in rheumatoid arthritis |                        | NS                 |        | 0.0170              | IL-12B, CSF1, IL-18, TNFSF13B, LTB, IL-1A, TLR4, TNFSF11, FAS, TNF                                                                   |
| Colorectal cancer metastasis signalling                      |                        | NS                 |        | 0.0170              | MMP12, JUN, PIK3CG, PRKAR1A, FNBP1, SOS2, TLR4, KL, RHOF, GNG4, BRAF, MMP1, GNB5, GNG2, IRS2, MAP2K4, MMP7, RHOU, STAT3, PTGER2, TNF |
| C-X-C chemokine receptor type 4 (CXCR4) signalling           | [39]                   | NS                 |        | 0.0174              | JUN, PIK3CG, FNBP1, KL, RHOF, PAK1, GNG4, GNB5, GNG2, IRS2, MAP2K4, GNAI3, GNAT2, RHOU, PRKCZ, PLCB1                                 |
| Phagosome formation                                          | [40]                   | NS                 |        | 0.0186              | PLCG2, IRS2, PIK3CG, INPP5D, FNBP1, FCGR2A, RHOU, TLR4, KL, PRKCZ, RHOF, PLCB1, FCAR                                                 |

| Ingenuity canonical pathways                                            | Association with COPD* | CHF6001 800 µg BID |        | CHF6001 1600 µg BID |                                                                                                         |
|-------------------------------------------------------------------------|------------------------|--------------------|--------|---------------------|---------------------------------------------------------------------------------------------------------|
|                                                                         |                        | p-value (FDR)†     | Genes‡ | p-value (FDR)*      | Genes‡                                                                                                  |
| Role of JAK2 in hormone-like cytokine signalling                        | [17]                   | NS                 |        | 0.0186              | STAT5B, SOCS3, PRL, IRS2, STAT3, EPOR                                                                   |
| N-Formylmethionyl-leucyl-phenylalanine (fMLP) signalling in neutrophils | [41]                   | NS                 |        | 0.0195              | GNG2, FPR1, IRS2, PIK3CG, GNAI3, FPR2, NCF1, KL, PRKCZ, PLCB1, NFATC2, GNG4, GNB5                       |
| Erythropoietin signalling                                               | [42]                   | NS                 |        | 0.0200              | STAT5B, PLCG2, IRS2, JUN, PIK3CG, SOS2, EPOR, SOCS3, KL, PRKCZ                                          |
| Chemokine signalling                                                    | [13]                   | NS                 |        | 0.0200              | PPP1CB, PLCG2, JUN, PIK3CG, GNAI3, CCL5, PLCB1, CCL4, CAMK1                                             |
| Role of JAK1 and JAK3 in $\gamma$ c cytokine signalling                 | [17]                   | NS                 |        | 0.0214              | STAT5B, IRS2, PIK3CG, FES, CRLF2, SOCS3, IL-4R, KL, STAT3                                               |
| Cardiac $\beta$ -adrenergic signalling                                  |                        | NS                 |        | 0.0219              | ATP2A3, PPP1CB, GNG2, PDE4D, PDE4B, PRKAR1A, PDE7A, AKAP12, PDE2A, PPP2R5C, AKAP13, GNG4, PPP2R2A, GNB5 |
| IL-9 signalling                                                         | [43]                   | NS                 |        | 0.0219              | STAT5B, KL, SOCS3, IRS2, STAT3, PIK3CG, TNF                                                             |

| Ingenuity canonical pathways                                                   | Association with COPD* | CHF6001 800 µg BID |        | CHF6001 1600 µg BID |                                                                                                 |
|--------------------------------------------------------------------------------|------------------------|--------------------|--------|---------------------|-------------------------------------------------------------------------------------------------|
|                                                                                |                        | p-value (FDR)†     | Genes‡ | p-value (FDR)*      | Genes‡                                                                                          |
| fms like tyrosine kinase 3 (FLT3) signalling in hematopoietic progenitor cells |                        | NS                 |        | 0.0219              | STAT5B, IRS2, STAT4, INPP5D, PIK3CG, SOS2, KL, GAB2, FLT3, STAT3                                |
| ErbB signalling                                                                | [44]                   | NS                 |        | 0.0224              | PLCG2, EREG, IRS2, JUN, PIK3CG, SOS2, MAP2K4, KL, PRKCZ, AREG, PAK1                             |
| IL-22 signalling                                                               | [13]                   | NS                 |        | 0.0229              | STAT5B, IL-22RA2, SOCS3, STAT3, MAP2K4                                                          |
| Growth hormone signalling                                                      | [45]                   | NS                 |        | 0.0229              | STAT5B, PLCG2, IRS2, IGF1R, PIK3CG, SOCS3, KL, PRL, PRKCZ, STAT3                                |
| Glioma signalling                                                              |                        | NS                 |        | 0.0240              | PDGFB, PLCG2, PDGFA, IRS2, IGF1R, E2F7, PIK3CG, SOS2, TFDP1, KL, PRKCZ, CAMK1                   |
| Crosstalk between dendritic cells and natural killer cells                     | [21,26,27]             | NS                 |        | 0.0240              | KIR2DL4, IL-12B, IL-18, LTB, FSCN1, TLR4, KLRD1, FAS, KIR2DL2, TNF                              |
| Gαq signalling                                                                 | [46]                   | NS                 |        | 0.0245              | PLCG2, GNG2, IRS2, PIK3CG, FNBP1, RHOA, PLD2, KL, PRKCZ, RHOA, NFATC2, PLCB1, GNG4, RGS18, GNB5 |

| Ingenuity canonical pathways                                                      | Association with COPD* | CHF6001 800 µg BID |        | CHF6001 1600 µg BID |                                                                                              |
|-----------------------------------------------------------------------------------|------------------------|--------------------|--------|---------------------|----------------------------------------------------------------------------------------------|
|                                                                                   |                        | p-value (FDR)†     | Genes‡ | p-value (FDR)*      | Genes‡                                                                                       |
| Toll-like receptor signalling                                                     | [47]                   | NS                 |        | 0.0288              | IL-12B, JUN, IL-18, MAP2K4, IL-1A, TLR4, IL-1RL1, MAP4K4, TNF                                |
| Cell cycle regulation by BTG family proteins                                      | [48]                   | NS                 |        | 0.0302              | NOCT, E2F7, PPP2R5C, BTG1, CCNE2, PPP2R2A                                                    |
| Protein kinase c theta (PKCθ) signalling in T lymphocytes                         | [49]                   | NS                 |        | 0.0324              | PLCG2, LCK, CD3E, IRS2, JUN, PIK3CG, MAP3K8, SOS2, MAP2K4, CD3G, KL, NFATC2, MAP3K2, MAP3K13 |
| Glial cell-derived neurotrophic factor (GDNF) family ligand-receptor interactions |                        | NS                 |        | 0.0331              | PLCG2, IRS2, JUN, PIK3CG, SOS2, MAP2K4, RASA1, DOK5, KL                                      |
| Acute myeloid leukaemia signalling                                                |                        | NS                 |        | 0.0331              | STAT5B, IRS2, PIK3CG, SOS2, MAP2K4, RARA, KL, FLT3, STAT3, BRAF                              |
| Glutathione biosynthesis                                                          | [50]                   | NS                 |        | 0.0331              | GCLM, GCLC                                                                                   |
| Insulin-like growth factor (IGF)-1 signalling                                     | [45]                   | NS                 |        | 0.0339              | IRS2, IGF1R, JUN, PIK3CG, PRKAR1A, SOS2, RASA1, SOCS3, KL, PRKCZ, STAT3                      |
| Atherosclerosis signalling                                                        |                        | NS                 |        | 0.0347              | PDGFB, PDGFA, CSF1, IL-18, PLB1, IL-1A, PNPLA8, COL1A1, ALOX15B, CD36, MMP1, TNF             |

| Ingenuity canonical pathways                           | Association with COPD* | CHF6001 800 µg BID |        | CHF6001 1600 µg BID |                                                                                                                   |
|--------------------------------------------------------|------------------------|--------------------|--------|---------------------|-------------------------------------------------------------------------------------------------------------------|
|                                                        |                        | p-value (FDR)†     | Genes‡ | p-value (FDR)*      | Genes‡                                                                                                            |
| PPARα/RXRα activation                                  | [14]                   | NS                 |        | 0.0347              | STAT5B, PLCG2, IL-1RL2, JUN, IL-18RAP, PRKAR1A, SOS2, MAP2K4, GK, IL-1RL1, MAP4K4, PLCB1, PRKAB1, CD36, IL-1R1    |
| Ceramide signalling                                    | [51]                   | NS                 |        | 0.0347              | IRS2, JUN, PIK3CG, MAP2K4, KL, PRKCZ, S1PR2, PPP2R5C, TNF, PPP2R2A                                                |
| IL-1 signalling                                        | [13]                   | NS                 |        | 0.0347              | GNG2, JUN, PRKAR1A, GNAI3, MAP2K4, GNAT2, IL-1A, IL-1R1, GNG4, GNB5                                               |
| Communication between innate and adaptive immune cells | [52]                   | NS                 |        | 0.0347              | IL-12B, IL-18, TNFSF13B, IL-1A, TLR4, CCL3, CCL5, CCL4, TNF                                                       |
| Thrombin signalling                                    |                        | NS                 |        | 0.0347              | PPP1CB, ARHGEF10, PIK3CG, FNBP1, KL, RHOF, GNG4, GNB5, GNG2, PLCG2, IRS2, GNAI3, GNAT2, RHOU, PRKCZ, PLCB1, CAMK1 |
| Sphingosine-1-phosphate signalling                     | [51]                   | NS                 |        | 0.0347              | PDGFB, PLCG2, PDGFA, IRS2, PIK3CG, FNBP1, GNAI3, RHOU, KL, RHOF, PLCB1, S1PR2                                     |

| Ingenuity canonical pathways                                     | Association with COPD* | CHF6001 800 µg BID |        | CHF6001 1600 µg BID |                                                                                                                                                                                               |
|------------------------------------------------------------------|------------------------|--------------------|--------|---------------------|-----------------------------------------------------------------------------------------------------------------------------------------------------------------------------------------------|
|                                                                  |                        | p-value (FDR)†     | Genes‡ | p-value (FDR)*      | Genes‡                                                                                                                                                                                        |
| Phosphoinositide 3-kinase/protein kinase B (PI3K/AKT) signalling | [9]                    | NS                 |        | 0.0347              | GDF15, MCL1, SYNJ1, INPP5D, PIK3CG, MAP3K8, SOS2, CDKN1B, PRKCZ, GAB2, PPP2R5C, PPP2R2A                                                                                                       |
| Agranulocyte adhesion and diapedesis                             | [28]                   | NS                 |        | 0.0398              | MMP12, IL-18, CXCR2, GNAI3, CXCL6, MMP7, IL-1A, MYH10, CXCR1, CCL3, CCL5, IL-1R1, MMP1, TNF, CCL4                                                                                             |
| Protein kinase A signalling                                      | [11,12]                | NS                 |        | 0.0427              | PPP1CB, DUSP4, PDE4D, PDE4B, PRKAR1A, DUSP6, MYH10, AKAP12, NFATC2, AKAP13, EBI3, CREM, GNG4, BRAF, GNB5, PLCG2, GNG2, GNAI3, MYLK3, MTMR3, DUSP16, PTPRC, PTP4A1, PRKCZ, PDE7A, PDE2A, PLCB1 |
| ErbB2-ErbB3 signalling                                           | [44]                   | NS                 |        | 0.0437              | STAT5B, IRS2, JUN, PIK3CG, SOS2, CDKN1B, KL, STAT3                                                                                                                                            |
| Epidermal growth factor (EGF) signalling                         | [53]                   | NS                 |        | 0.0437              | KL, IRS2, JUN, STAT3, PIK3CG, SOS2, MAP2K4, RASA1                                                                                                                                             |
| Calcium-induced T lymphocyte apoptosis                           | [54]                   | NS                 |        | 0.0457              | ATP2A3, MEF2D, PRKCZ, CD3E, LCK, NFATC2, CD3G                                                                                                                                                 |



CHF6001 high-throughput gene expression analysis – supplement

| Ingenuity canonical pathways                                             | Association with COPD* | CHF6001 800 µg BID |        | CHF6001 1600 µg BID |                                                                                            |
|--------------------------------------------------------------------------|------------------------|--------------------|--------|---------------------|--------------------------------------------------------------------------------------------|
|                                                                          |                        | p-value (FDR)†     | Genes‡ | p-value (FDR)*      | Genes‡                                                                                     |
| JAK/signal transducers and activators of transcription (Stat) signalling | [17]                   | NS                 |        | 0.0457              | STAT5B, IRS2, JUN, STAT4, PIK3CG, SOS2, SOCS3, KL, STAT3                                   |
| Glioblastoma multiforme signalling                                       |                        | NS                 |        | 0.0457              | PLCG2, PDGFB, PDGFA, IRS2, IGF1R, E2F7, PIK3CG, FNBP1, SOS2, CDKN1B, RHOU, KL, RHOF, PLCB1 |
| G beta gamma signalling                                                  | [10]                   | NS                 |        | 0.0490              | GNG2, PLCG2, PIK3CG, PRKAR1A, SOS2, GNAI3, GNAT2, PRKCZ, PAK1, GNG4, GNB5                  |

Abbreviations: BID, twice daily; NS, not significant; IL, interleukin; Th, T helper; JAK, Janus kinase; PPAR, peroxisome proliferator-activated receptor; RXR, retinoid X receptor.

Figure S3. Graphical gene relationship simulation of perturbations using Ingenuity Pathway Analysis Molecule Activity Predictor (MAP) for CHF6001 1600 µg COPD pathways associated with clear-cut and consistent inhibition of downstream inflammatory mediators or conditions

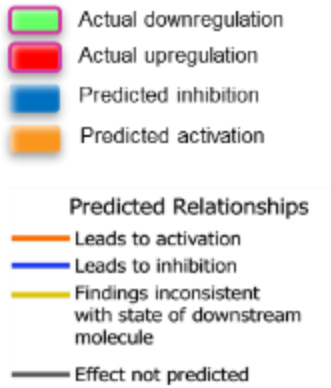

C-C chemokine receptor type 5 (CCR5) signalling in macrophages

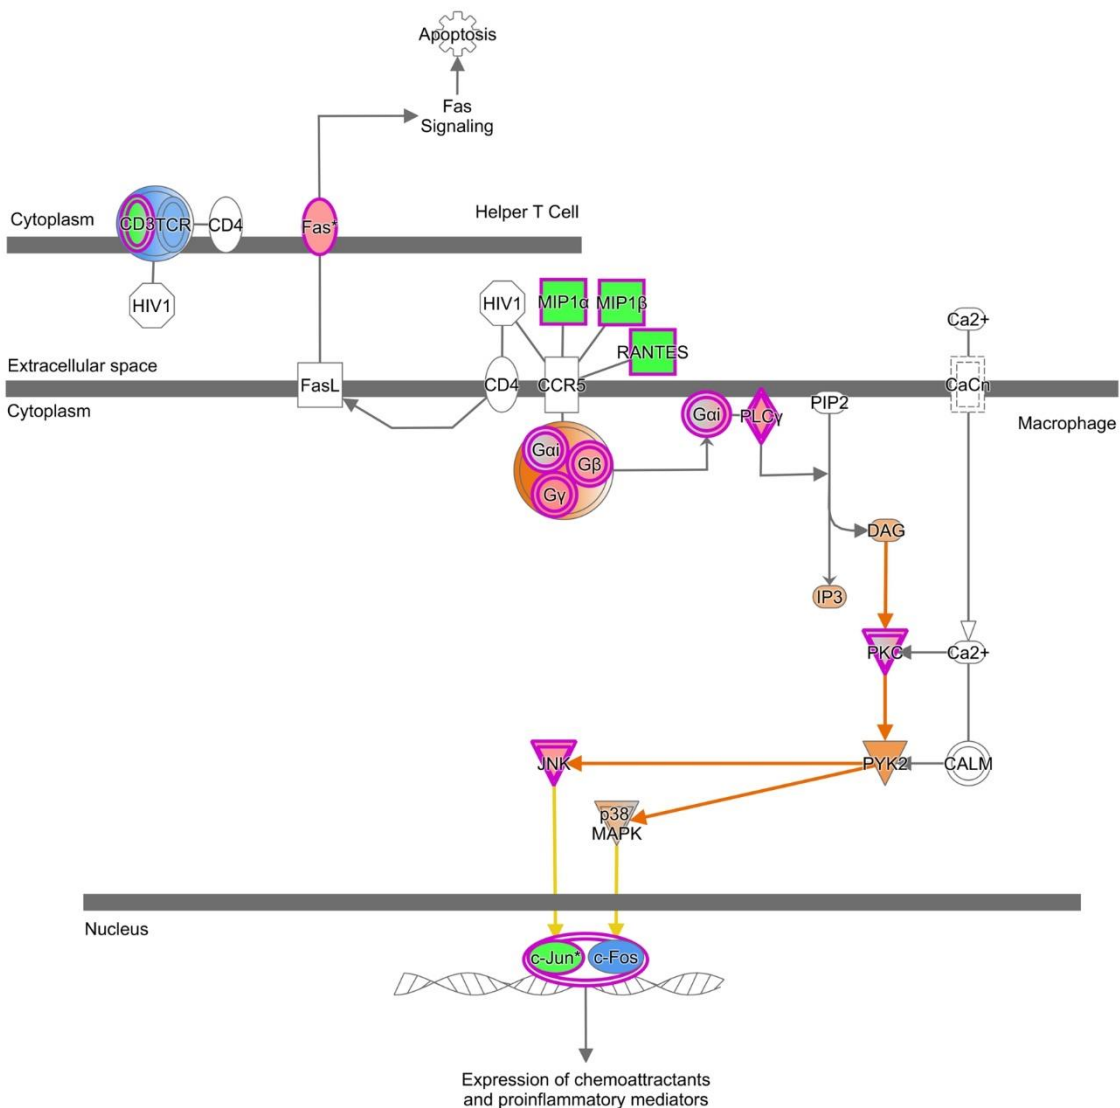

### Chemokine signalling

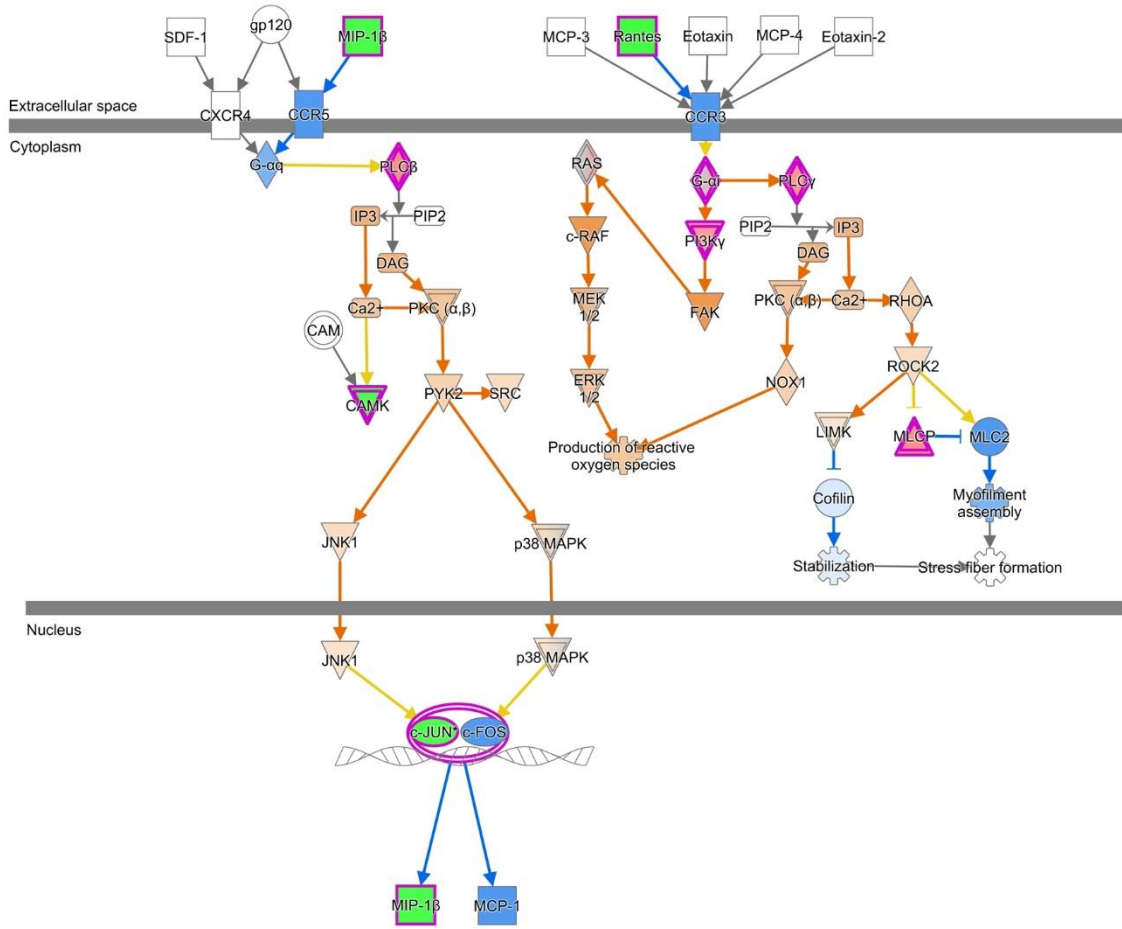

High mobility group-B1 (HMGB1) signalling

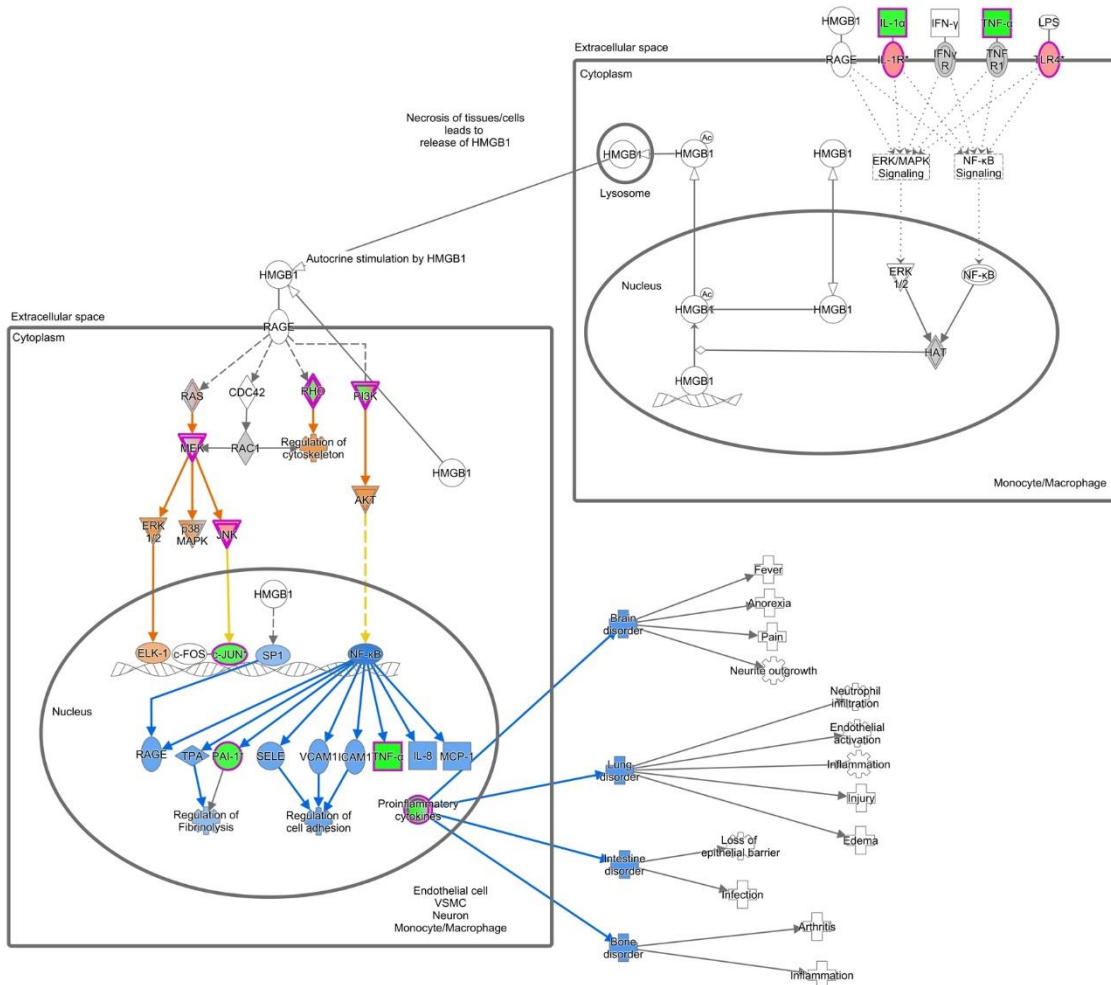

Triggering receptor expressed on myeloid cells 1 (TREM1) signalling

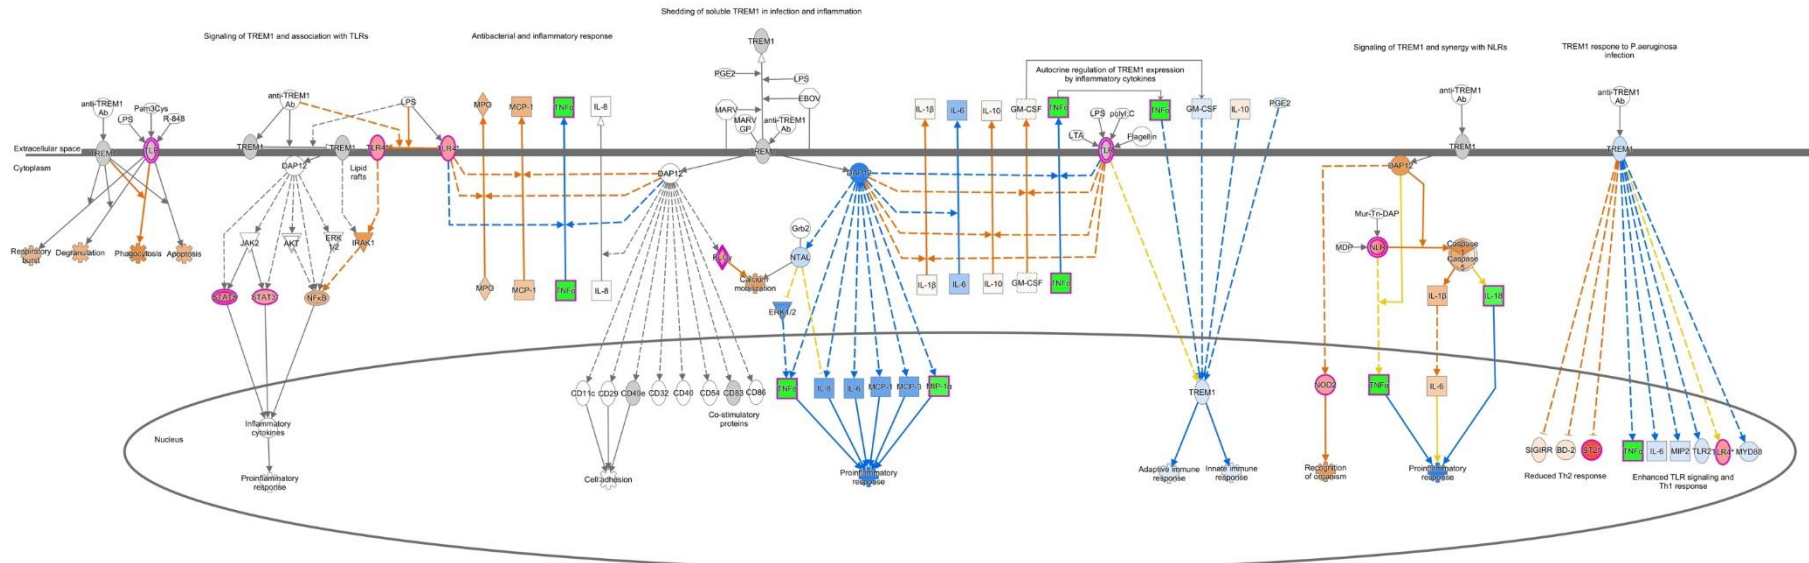

Interleukin 22 signalling

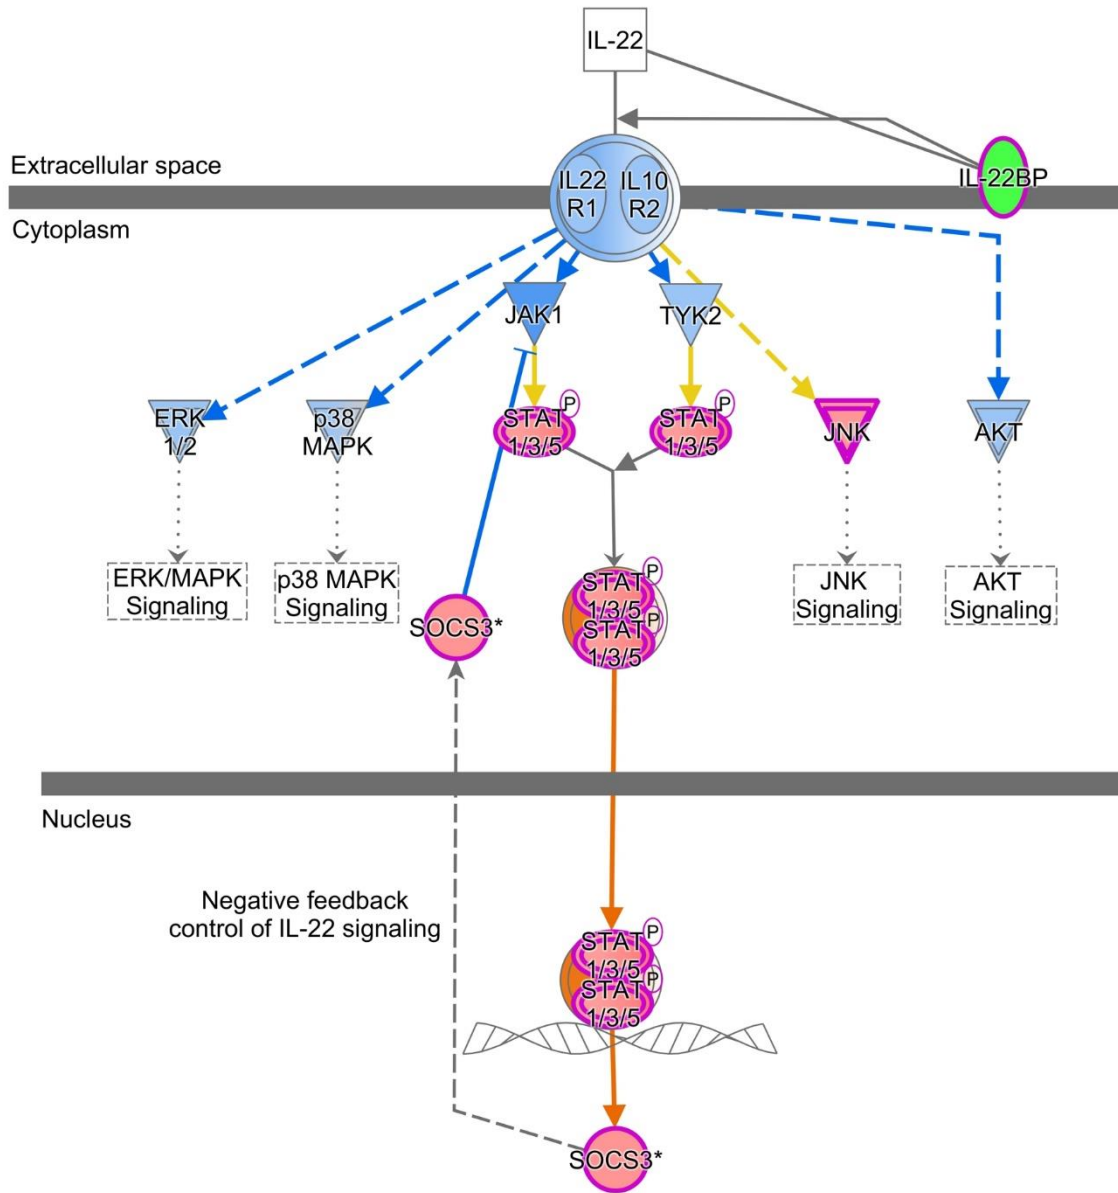

Ceramide signalling

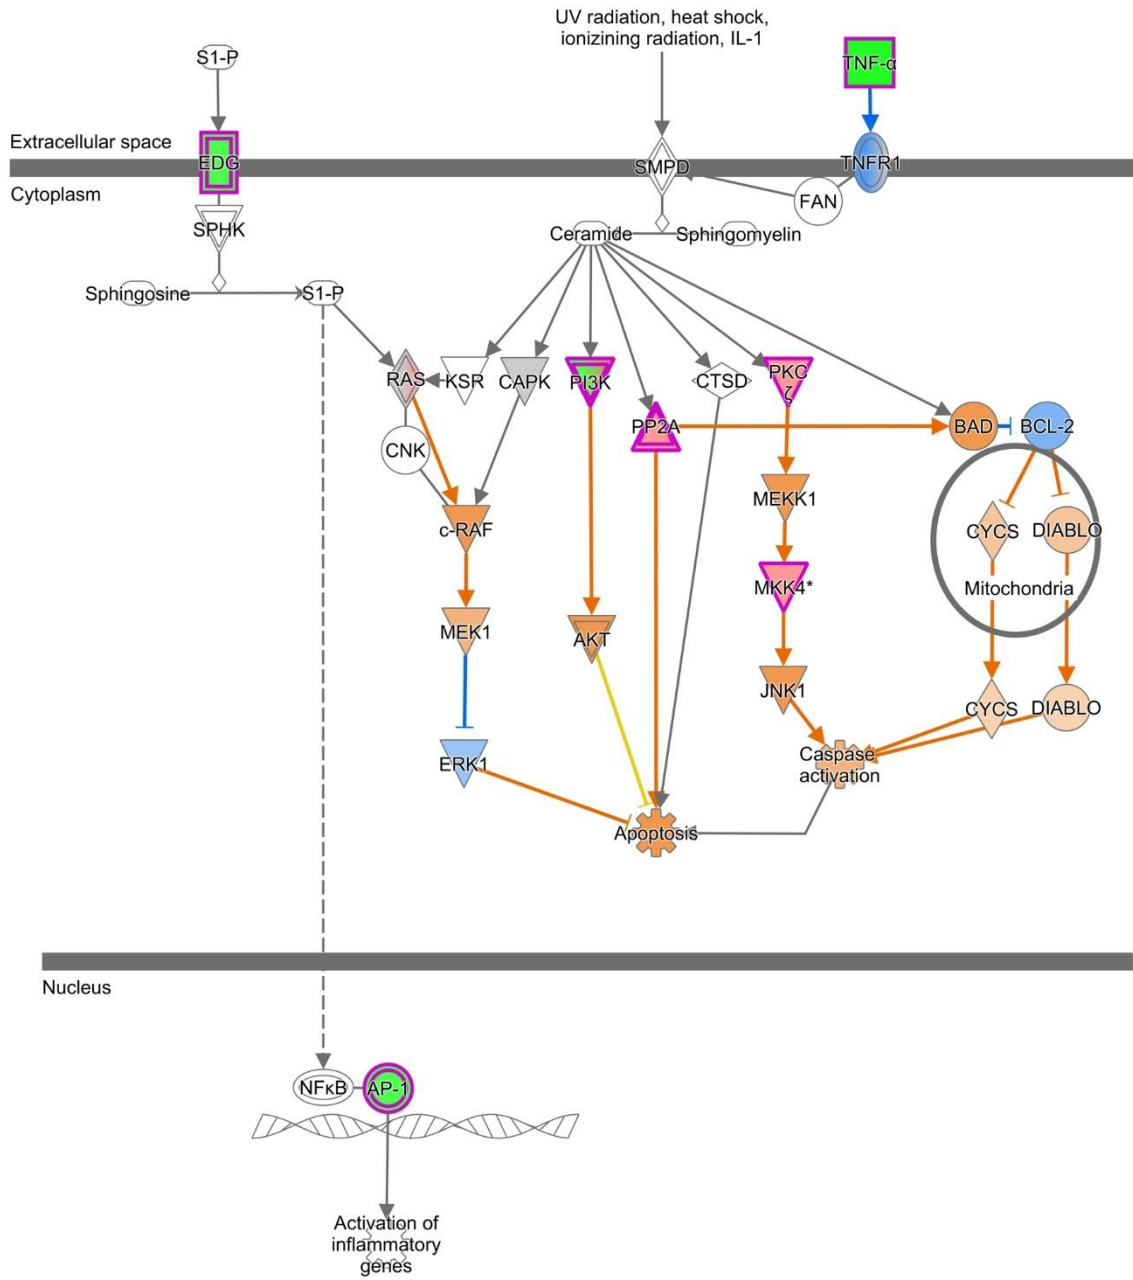

Protein kinase c theta (PKCθ) signalling in T lymphocytes

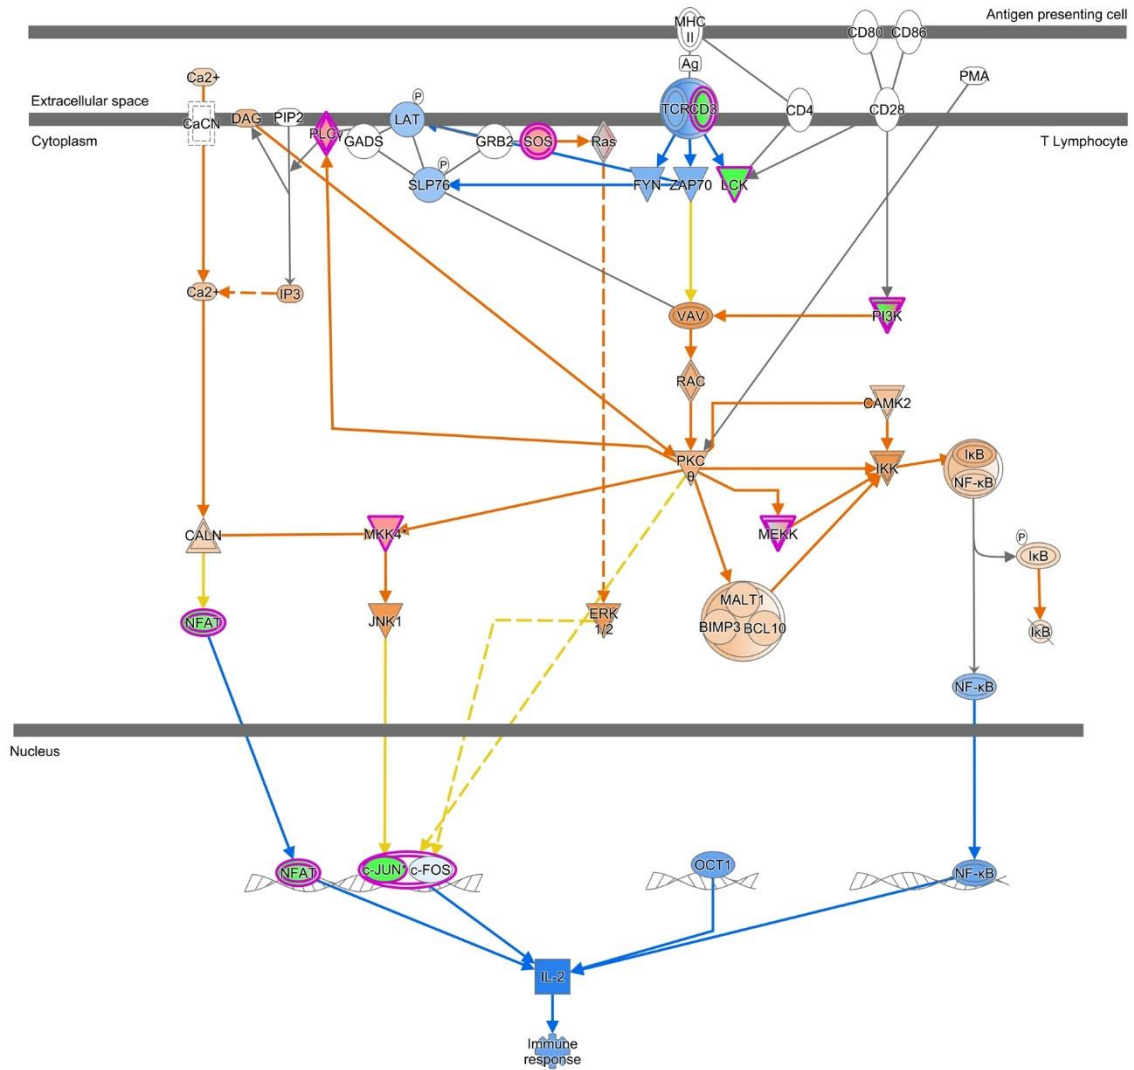



Role of pattern recognition receptors in recognition of bacteria and viruses

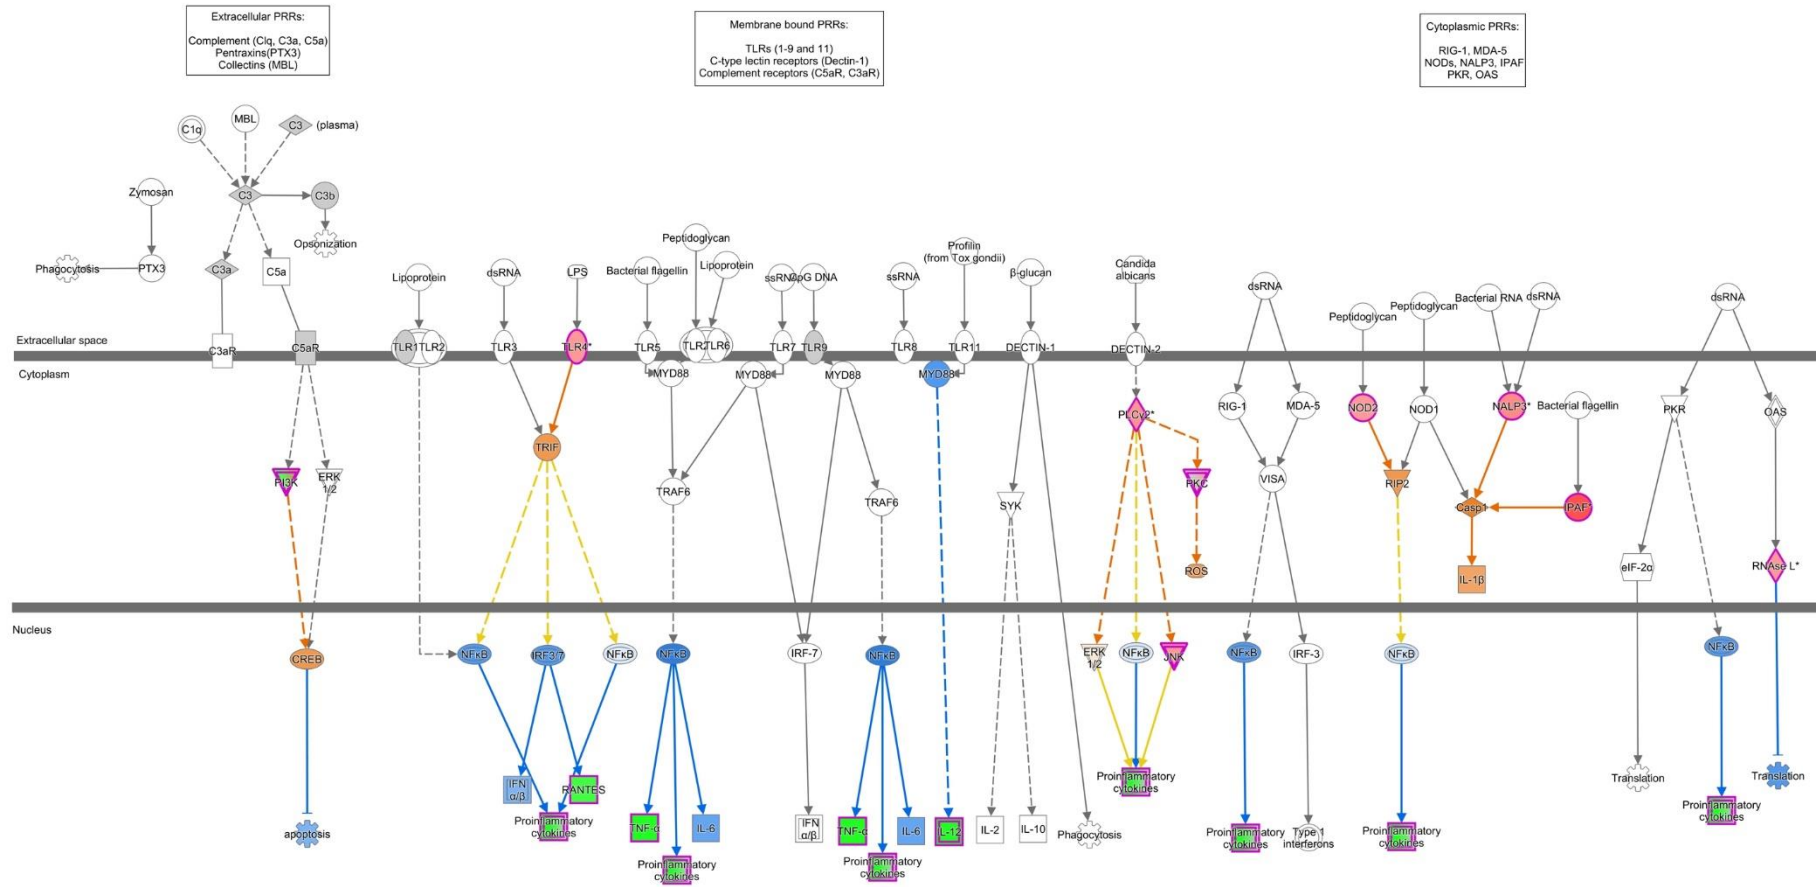

Toll-like receptors signalling

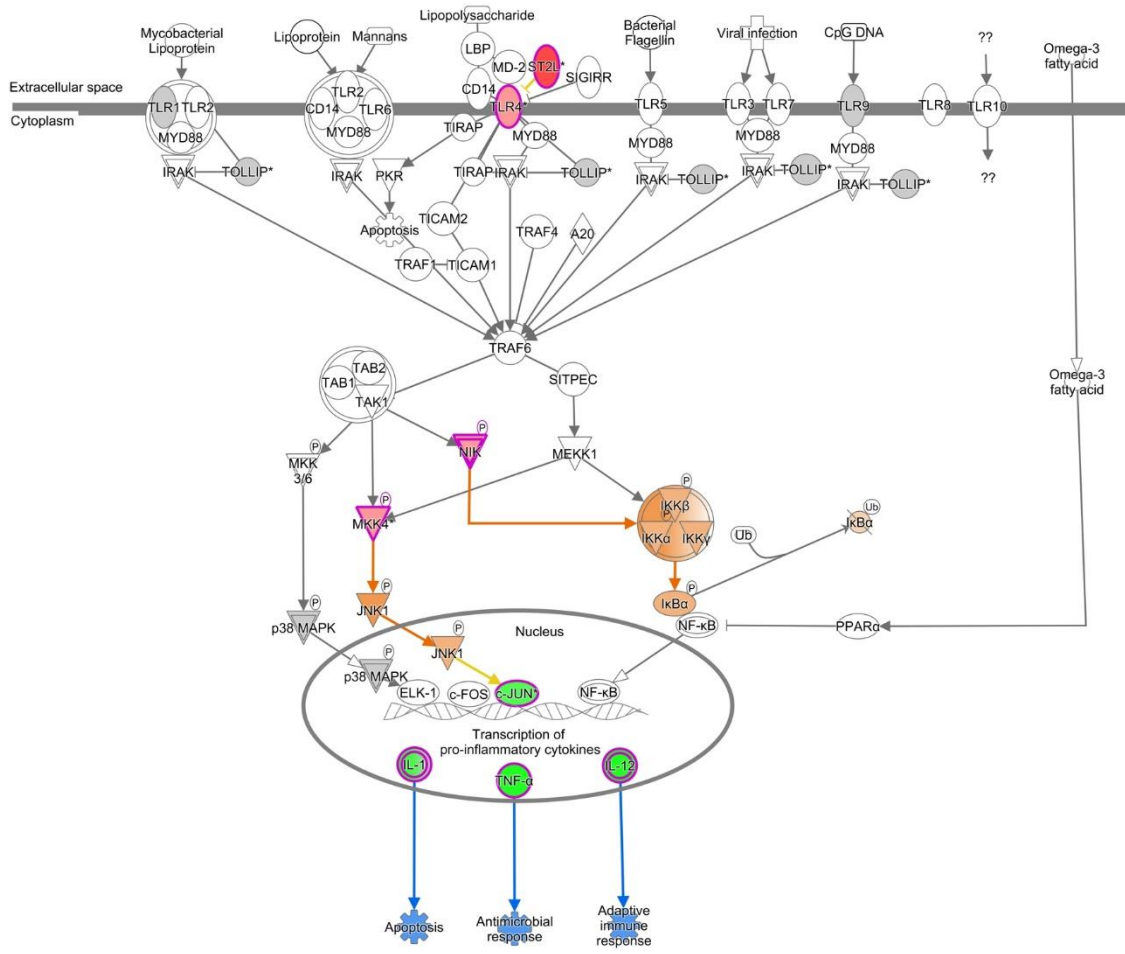

N-formylmethionyl-leucyl-phenylalanine (fMLP) signalling in neutrophils

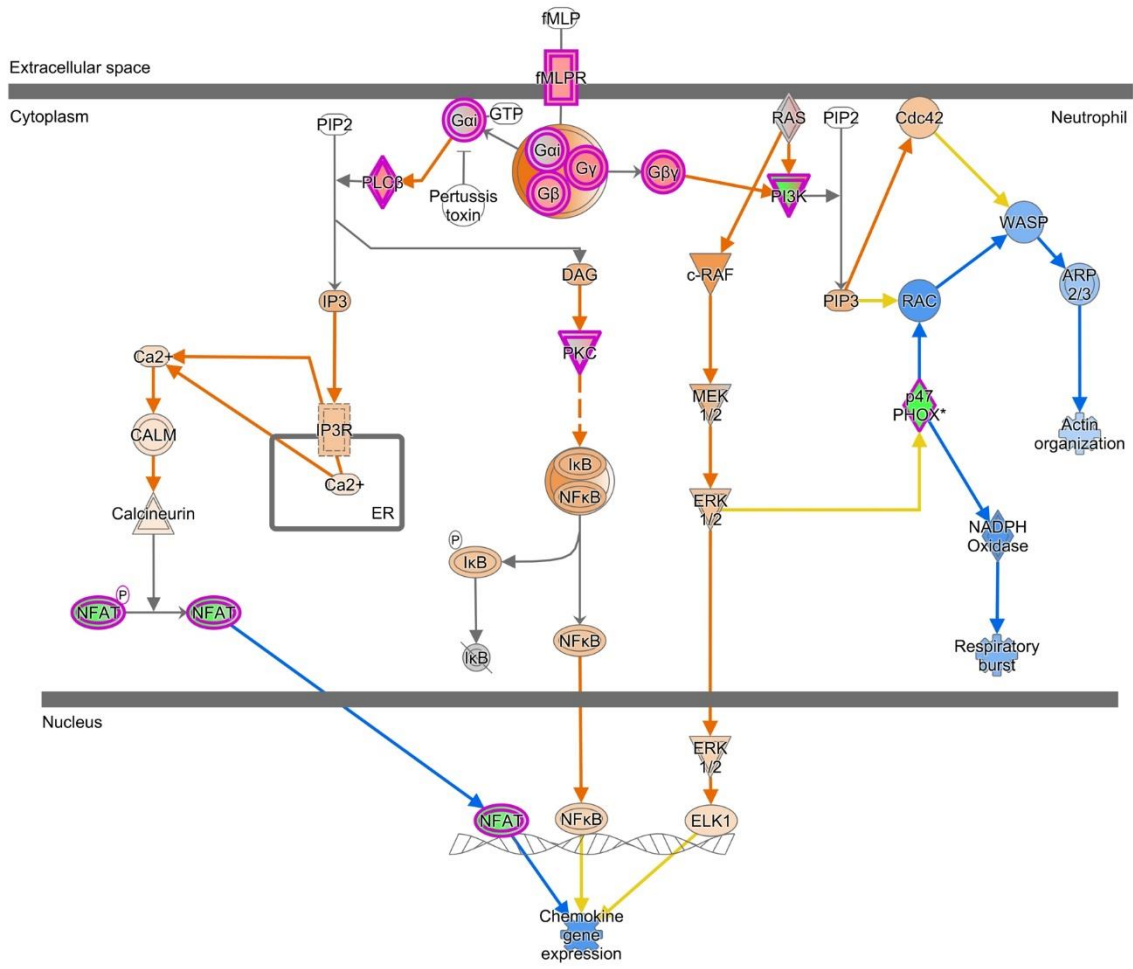

Production of nitric oxide and reactive oxygen species in macrophages

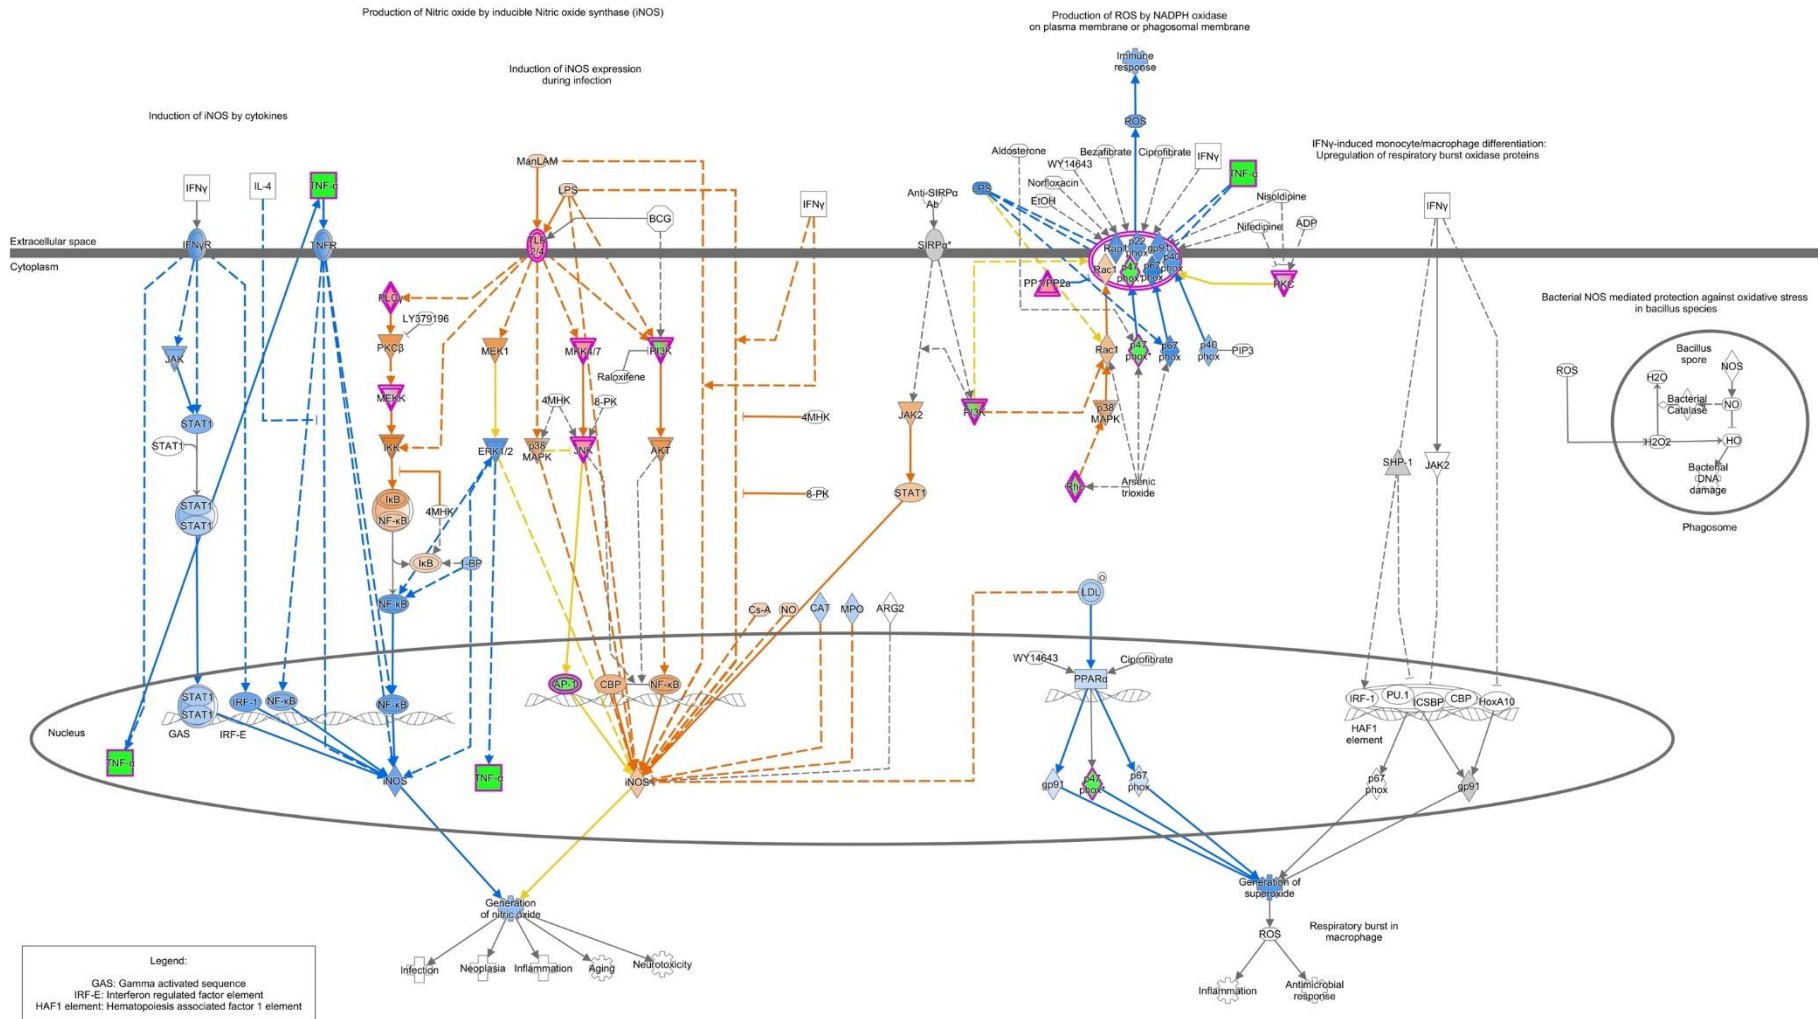

Vitamin D receptor activation

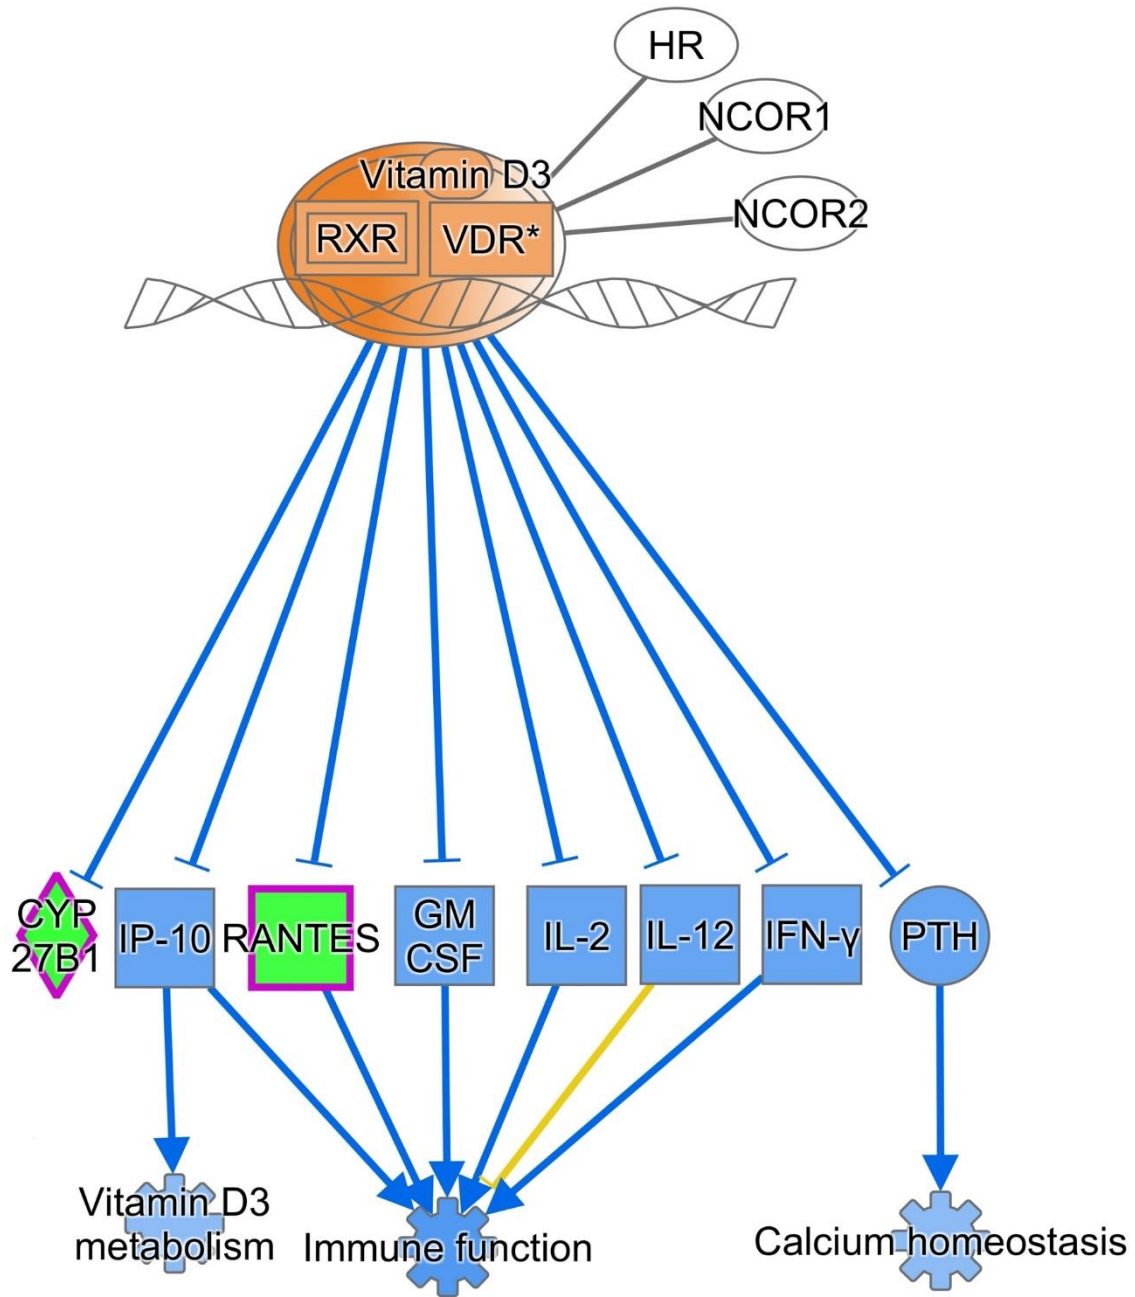

Table S2. Top 10 gene ontology biological processes and gene ontology molecular functions significantly affected by CHF6001.

| CHF6001 800 µg BID |                                           | CHF6001 1600 µg BID |                                                 |         |
|--------------------|-------------------------------------------|---------------------|-------------------------------------------------|---------|
|                    | Description                               | pFDR                | Description                                     | pFDR    |
|                    | programmed cell death                     | <0.0001             | immune system process                           | <0.0001 |
|                    | regulation of apoptotic process           | <0.0001             | regulation of response to stimulus              | <0.0001 |
|                    | apoptotic process                         | <0.0001             | immune response                                 | <0.0001 |
|                    | regulation of programmed cell death       | <0.0001             | intracellular signal transduction               | <0.0001 |
| Biological         | cell death                                | <0.0001             | regulation of intracellular signal transduction | <0.0001 |
| process            | signal transduction                       | 0.0001              | leukocyte activation                            | <0.0001 |
|                    | immune system process                     | 0.0001              | signal transduction                             | <0.0001 |
|                    | positive regulation of biological process | 0.0001              | cell activation                                 | <0.0001 |
|                    | regulation of cell death                  | 0.0001              | positive regulation of biological process       | <0.0001 |
|                    | regulation of response to stimulus        | 0.0002              | single organism signalling                      | <0.0001 |

CHF6001 high-throughput gene expression analysis – supplement

| CHF6001 800 µg BID                                              |        | CHF6001 1600 µg BID             |        |
|-----------------------------------------------------------------|--------|---------------------------------|--------|
| Description                                                     | pFDR   | Description                     | pFDR   |
| cytokine receptor activity                                      | 0.0042 | cytokine receptor activity      | 0.0058 |
| interleukin-1 receptor activity                                 | 0.0042 | ribonucleotide binding          | 0.0103 |
| pantetheine hydrolase activity                                  | 0.0042 | cytokine activity               | 0.0103 |
| phosphotransferase activity, alcohol group as acceptor          | 0.0323 | purine ribonucleotide binding   | 0.0103 |
| interleukin-1 binding                                           | 0.0471 | purine nucleotide binding       | 0.0103 |
| 3',5'-cyclic-AMP phosphodiesterase activity                     | 0.0471 | purine ribonucleoside binding   | 0.0103 |
| kinase activity                                                 | 0.0471 | pantetheine hydrolase activity  | 0.0103 |
| transferase activity, transferring phosphorus-containing groups | 0.0471 | purine nucleoside binding       | 0.0103 |
| interleukin-1, Type I, activating receptor activity             | 0.0471 | ribonucleoside binding          | 0.0103 |
| interleukin-8 receptor activity                                 | 0.0471 | carbohydrate derivative binding | 0.0103 |

Abbreviations: BID, twice daily.

**Inflammatory gene interaction network analysis**

Table S3. Proinflammatory cytokines and matrix-metalloproteinases differentially expressed ( $pFDR < 0.05$  or  $p < 0.05$  and  $|FC| > 1.3$ ) after treatment with CHF6001 800  $\mu$ g BID relative to placebo. ¥ common genes with CHF6001 1600  $\mu$ g BID.

| Probe set_ID     | Gene Symbol                       | Entrez Gene                    | Fold change vs. placebo | p value  | pFDR value | Gene Title                                                                                                         |
|------------------|-----------------------------------|--------------------------------|-------------------------|----------|------------|--------------------------------------------------------------------------------------------------------------------|
| <b>Cytokines</b> |                                   |                                |                         |          |            |                                                                                                                    |
| 216598_s_at      | CCL2                              | 6347                           | -1.30                   | 1.08E-03 | 3.70E-02   | chemokine (C-C motif) ligand 2                                                                                     |
| 205114_s_at      | CCL3 ///<br>CCL3L1 ///<br>CCL3L3¥ | 6348 ///<br>6349 ///<br>414062 | -1.27                   | 3.60E-05 | 2.89E-03   | chemokine (C-C motif) ligand 3 /// chemokine (C-C motif) ligand 3-like 1 /// chemokine (C-C motif) ligand 3-like 3 |
| 204103_at        | CCL4¥                             | 6351                           | -1.28                   | 2.85E-05 | 2.38E-03   | chemokine (C-C motif) ligand 4                                                                                     |
| 1555759_a_at     | CCL5¥                             | 6352                           | -1.43                   | 2.12E-03 | 5.90E-02   | chemokine (C-C motif) ligand 5                                                                                     |
| 208075_s_at      | CCL7                              | 6354                           | -1.32                   | 2.56E-02 | 2.41E-01   | chemokine (C-C motif) ligand 7                                                                                     |
| 206336_at        | CXCL6¥                            | 6372                           | 1.35                    | 8.34E-03 | 1.35E-01   | chemokine (C-X-C motif) ligand 6                                                                                   |
| 203915_at        | CXCL9                             | 4283                           | -1.62                   | 9.28E-03 | 1.43E-01   | chemokine (C-X-C motif) ligand 9                                                                                   |
| 204533_at        | CXCL10                            | 3627                           | -1.80                   | 2.06E-02 | 2.16E-01   | chemokine (C-X-C motif) ligand 10                                                                                  |
| 210390_s_at      | CCL15 ///<br>CCL15-<br>CCL14¥     | 6359 ///<br>348249             | -1.81                   | 3.78E-04 | 1.71E-02   | chemokine (C-C motif) ligand 15 /// CCL15-CCL14 readthrough (NMD candidate)                                        |



## CHF6001 high-throughput gene expression analysis – supplement

| Probe set_ID                     | Gene Symbol            | Entrez Gene | Fold change vs. placebo | p value  | pFDR value | Gene Title                                              |
|----------------------------------|------------------------|-------------|-------------------------|----------|------------|---------------------------------------------------------|
| 219424_at                        | EBI3 <sup>‡</sup>      | 10148       | -1.42                   | 5.08E-05 | 3.82E-03   | Epstein-Barr virus induced 3                            |
| 207901_at                        | IL-12B <sup>‡</sup>    | 3593        | -2.23                   | 4.37E-06 | 5.09E-04   | interleukin 12B                                         |
| 205992_s_at                      | IL-15                  | 3600        | -1.32                   | 5.14E-03 | 1.01E-01   | interleukin 15                                          |
| 203828_s_at                      | IL-32 <sup>‡</sup>     | 9235        | -1.46                   | 4.22E-04 | 1.86E-02   | interleukin 32                                          |
| 1568574_x_at                     | SPP1                   | 6696        | -1.27                   | 6.89E-04 | 2.70E-02   | secreted phosphoprotein 1                               |
| 207113_s_at                      | TNF <sup>‡</sup>       | 7124        | -1.37                   | 1.78E-02 | 2.01E-01   | tumour necrosis factor                                  |
| 229814_at                        | TNFAIP8 <sup>‡</sup>   | 25816       | -1.33                   | 4.18E-05 | 3.23E-03   | tumour necrosis factor, alpha-induced protein 8         |
| 227420_at                        | TNFAIP8L1 <sup>‡</sup> | 126282      | -1.35                   | 8.20E-05 | 5.49E-03   | tumour necrosis factor, alpha-induced protein 8-like 1  |
| 241819_at                        | TNFSF8 <sup>‡</sup>    | 944         | -1.33                   | 6.75E-03 | 1.19E-01   | tumour necrosis factor (ligand) superfamily, member 8   |
| 223502_s_at                      | TNFSF13B <sup>‡</sup>  | 10673       | 1.35                    | 5.27E-06 | 5.90E-04   | tumour necrosis factor (ligand) superfamily, member 13b |
| 229242_at                        | TNFSF15 <sup>‡</sup>   | 9966        | -1.62                   | 1.79E-04 | 9.88E-03   | tumour necrosis factor (ligand) superfamily, member 15  |
| <b>Matrix metalloproteinases</b> |                        |             |                         |          |            |                                                         |
| 201069_at                        | MMP2 <sup>‡</sup>      | 4313        | -1.32                   | 1.28E-02 | 1.70E-01   | matrix metalloproteinase 2                              |
| 204259_at                        | MMP7 <sup>‡</sup>      | 4316        | -1.71                   | 5.44E-05 | 4.02E-03   | matrix metalloproteinase 7                              |
| 204580_at                        | MMP12 <sup>‡</sup>     | 4321        | -1.36                   | 1.05E-04 | 6.64E-03   | matrix metalloproteinase 12                             |

CHF6001 high-throughput gene expression analysis – supplement

| Probe set_ID | Gene Symbol | Entrez Gene | Fold change vs. placebo | p value  | pFDR value | Gene Title                                      |
|--------------|-------------|-------------|-------------------------|----------|------------|-------------------------------------------------|
| 202827_s_at  | MMP14*      | 4323        | -1.30                   | 6.09E-04 | 2.46E-02   | Matrix metalloproteinase 14 (membrane-inserted) |

Table S4. Proinflammatory cytokines and matrix-metalloproteinases differentially expressed ( $pFDR < 0.05$  or  $p < 0.05$  and  $|FC| > 1.3$ ) after treatment with CHF6001 1600  $\mu\text{g}$  BID relative to placebo. ¥ common genes with CHF6001 800  $\mu\text{g}$  BID.

| Probe set_ID     | Gene Symbol                       | Entrez Gene                    | Fold change vs. placebo | p value  | pFDR value | Gene Title                                                                                                         |
|------------------|-----------------------------------|--------------------------------|-------------------------|----------|------------|--------------------------------------------------------------------------------------------------------------------|
| <b>Cytokines</b> |                                   |                                |                         |          |            |                                                                                                                    |
| 205114_s_at      | CCL3 ///<br>CCL3L1 ///<br>CCL3L3¥ | 6348 ///<br>6349 ///<br>414062 | -1.39                   | 3.67E-08 | 3.63E-06   | chemokine (C-C motif) ligand 3 /// chemokine (C-C motif) ligand 3-like 1 /// chemokine (C-C motif) ligand 3-like 3 |
| 204103_at        | CCL4¥                             | 6351                           | -1.38                   | 1.63E-07 | 1.34E-05   | chemokine (C-C motif) ligand 4                                                                                     |
| 1555759_a_at     | CCL5¥                             | 6352                           | -1.42                   | 2.10E-03 | 3.13E-02   | chemokine (C-C motif) ligand 5                                                                                     |
| 210390_s_at      | CCL15 ///<br>CCL15-<br>CCL14¥     | 6359 ///<br>348249             | -1.50                   | 1.16E-02 | 1.03E-01   | chemokine (C-C motif) ligand 15 /// CCL15-CCL14 readthrough (NMD candidate)                                        |
| 209716_at        | CSF1                              | 1435                           | -1.35                   | 1.53E-03 | 2.50E-02   | colony stimulating factor 1 (macrophage)                                                                           |
| 206336_at        | CXCL6¥                            | 6372                           | 1.44                    | 1.60E-03 | 2.58E-02   | chemokine (C-X-C motif) ligand 6                                                                                   |
| 219424_at        | EBI3¥                             | 10148                          | -1.35                   | 3.46E-04 | 8.00E-03   | Epstein-Barr virus induced 3                                                                                       |
| 210354_at        | IFNG                              | 3458                           | -1.52                   | 1.85E-02 | 1.39E-01   | interferon, gamma                                                                                                  |
| 210118_s_at      | IL-1A                             | 3552                           | -1.53                   | 1.51E-03 | 2.48E-02   | interleukin 1 alpha                                                                                                |
| 207901_at        | IL-12B¥                           | 3593                           | -1.86                   | 2.83E-04 | 6.84E-03   | interleukin 12B                                                                                                    |

## CHF6001 high-throughput gene expression analysis – supplement

| Probe set_ID | Gene Symbol            | Entrez Gene | Fold change vs. placebo | p value  | pFDR value | Gene Title                                              |
|--------------|------------------------|-------------|-------------------------|----------|------------|---------------------------------------------------------|
| 206295_at    | IL-18                  | 3606        | -1.35                   | 2.96E-04 | 7.10E-03   | interleukin 18                                          |
| 220745_at    | IL-19                  | 29949       | -1.34                   | 2.75E-02 | 1.77E-01   | interleukin 19                                          |
| 221111_at    | IL-26                  | 55801       | -1.35                   | 8.10E-03 | 8.11E-02   | interleukin 26                                          |
| 203828_s_at  | IL-32 <sup>¶</sup>     | 9235        | -1.45                   | 4.17E-04 | 9.30E-03   | interleukin 32                                          |
| 220322_at    | IL-36G                 | 56300       | -1.38                   | 3.96E-02 | 2.20E-01   | interleukin 36, gamma                                   |
| 206975_at    | LTA                    | 4049        | -1.29                   | 7.47E-05 | 2.36E-03   | lymphotoxin alpha                                       |
| 207339_s_at  | LTB                    | 4050        | -1.38                   | 2.93E-03 | 3.97E-02   | lymphotoxin beta (TNF superfamily, member 3)            |
| 203085_s_at  | TGFB1                  | 7040        | -1.15                   | 1.40E-03 | 2.35E-02   | transforming growth factor beta 1                       |
| 207113_s_at  | TNF <sup>¶</sup>       | 7124        | -1.86                   | 6.00E-06 | 2.91E-04   | tumour necrosis factor                                  |
| 229814_at    | TNFAIP8 <sup>¶</sup>   | 25816       | -1.24                   | 1.54E-03 | 2.51E-02   | tumour necrosis factor, alpha-induced protein 8         |
| 227420_at    | TNFAIP8L1 <sup>¶</sup> | 126282      | -1.29                   | 5.81E-04 | 1.20E-02   | tumour necrosis factor, alpha-induced protein 8-like 1  |
| 241819_at    | TNFSF8 <sup>¶</sup>    | 944         | -1.46                   | 4.08E-04 | 9.14E-03   | tumour necrosis factor (ligand) superfamily, member 8   |
| 210643_at    | TNFSF11                | 8600        | 1.47                    | 2.40E-03 | 3.45E-02   | tumour necrosis factor (ligand) superfamily, member 11  |
| 223502_s_at  | TNFSF13B <sup>¶</sup>  | 10673       | 1.64                    | 2.18E-12 | 7.91E-10   | tumour necrosis factor (ligand) superfamily, member 13b |
| 207907_at    | TNFSF14                | 8740        | -1.36                   | 6.81E-03 | 7.19E-02   | tumour necrosis factor (ligand) superfamily, member 14  |
| 229242_at    | TNFSF15 <sup>¶</sup>   | 9966        | -1.74                   | 1.47E-05 | 6.20E-04   | tumour necrosis factor (ligand) superfamily, member 15  |

## CHF6001 high-throughput gene expression analysis – supplement

---

| Probe set_ID                     | Gene Symbol | Entrez Gene | Fold change vs. placebo | p value  | pFDR value | Gene Title                                      |
|----------------------------------|-------------|-------------|-------------------------|----------|------------|-------------------------------------------------|
| <b>Matrix metalloproteinases</b> |             |             |                         |          |            |                                                 |
| 204475_at                        | MMP1        | 4312        | -1.56                   | 1.16E-03 | 2.03E-02   | matrix metalloproteinase 1                      |
| 201069_at                        | MMP2*       | 4313        | -1.31                   | 1.22E-02 | 1.07E-01   | matrix metalloproteinase 2                      |
| 204259_at                        | MMP7*       | 4316        | -1.58                   | 4.11E-04 | 9.17E-03   | matrix metalloproteinase 7                      |
| 204580_at                        | MMP12*      | 4321        | -1.47                   | 1.56E-06 | 9.36E-05   | matrix metalloproteinase 12                     |
| 217279_x_at                      | MMP14*      | 4323        | -1.15                   | 4.52E-05 | 1.56E-03   | matrix metalloproteinase 14 (membrane-inserted) |
| 207289_at                        | MMP25       | 64386       | 1.34                    | 1.45E-02 | 1.19E-01   | matrix metalloproteinase 25                     |

---

**Figure S4. Network connection between all pro-inflammatory cytokines and matrix-metalloproteinases differentially expressed ( $FDR < 0.05$  or  $p < 0.05$  and  $|FC| > 1.3$ ) by either dose treatment and the PDE4 isoforms inhibited by CHF6001. Each node represents all the proteins produced by a single, protein-coding gene locus, edges represent proteins that jointly contribute to a shared function, and the information inside the circle describes protein structure; a red line indicates the presence of fusion evidence; a green line, neighbourhood evidence; a blue line, co-occurrence evidence; a magenta line, experimental evidence; a yellow line, text mining evidence; a light blue line, database evidence; a black line, co-expression evidence; a purple line, protein homology evidence. Red nodes: 800  $\mu\text{g}$  BID, blue nodes: 1600  $\mu\text{g}$  BID. A green halo around the nodes: downregulation, a red halo: upregulation. \*on the nodes:  $p < 0.05$  and  $|FC| > 1.3$  in at least one dose.**

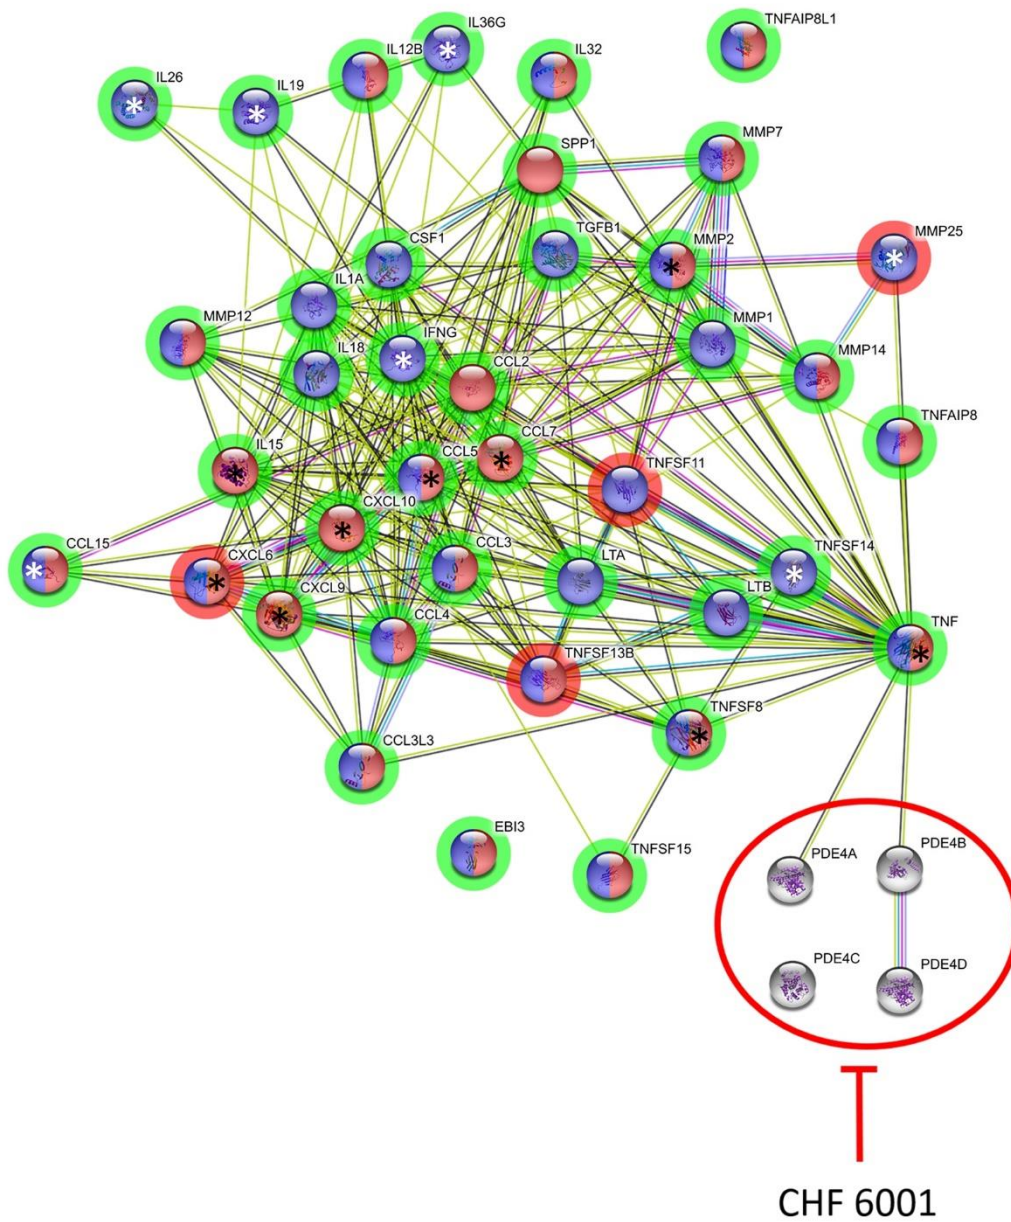

**Figure S5. Network of genes associated with the pathophysiology of COPD and differentially expressed ( $pFDR < 0.05$  or  $p < 0.05$  and  $|FC| > 1.3$ ) in favour of reduced inflammatory conditions after treatment with CHF6001 800  $\mu$ g BID relative to placebo. Each node represents all the proteins produced by a single, protein-coding gene locus, edges represent proteins that jointly contribute to a shared function, and the information inside the circle describes protein structure. Edges: a red line indicates the presence of fusion evidence; a green line, neighbourhood evidence; a blue line, co-occurrence evidence; a magenta line, experimental evidence; a yellow line, text mining evidence; a light blue line, database evidence; a black line, co-expression evidence; a purple line, protein homology evidence. A green halo around the nodes: downregulation, a red halo: upregulation. \*on the nodes:  $p < 0.05$  and  $|FC| > 1.3$**

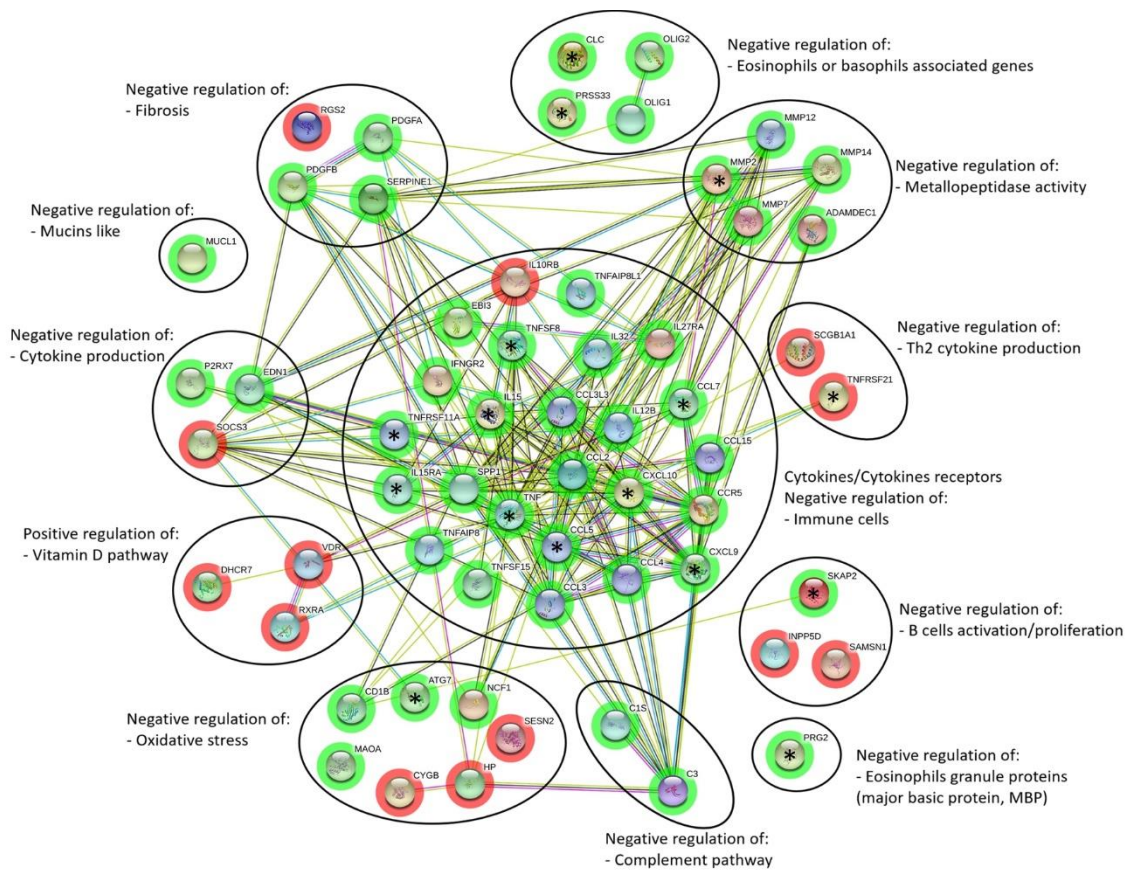

Table S5. Genes associated with the pathophysiology of COPD and differentially expressed ( $pFDR < 0.05$  or  $p < 0.05$  and  $|FC| > 1.3$ ) in favour of reduced inflammatory conditions after treatment with CHF6001 800  $\mu\text{g}$  BID relative to placebo. \* common genes with CHF6001 1600  $\mu\text{g}$  BID.

| Probe set_ID                                                               | Gene Symbol                       | Entrez Gene                    | Fold change vs. placebo | p value  | pFDR value | Gene Title                                                                                                         |
|----------------------------------------------------------------------------|-----------------------------------|--------------------------------|-------------------------|----------|------------|--------------------------------------------------------------------------------------------------------------------|
| <b>Negative regulation of eosinophil or basophil associated genes</b>      |                                   |                                |                         |          |            |                                                                                                                    |
| 206207_at                                                                  | CLC*                              | 1178                           | -1.33                   | 4.90E-02 | 3.28E-01   | Charcot-Leyden crystal galectin                                                                                    |
| 228170_at                                                                  | OLIG1*                            | 116448                         | -2.16                   | 7.38E-08 | 1.81E-05   | oligodendrocyte transcription factor 1                                                                             |
| 213825_at                                                                  | OLIG2*                            | 10215                          | -2.02                   | 7.42E-09 | 2.53E-06   | oligodendrocyte lineage transcription factor 2                                                                     |
| 1552349_a_at                                                               | PRSS33*                           | 260429                         | -1.34                   | 1.37E-02 | 1.76E-01   | protease, serine, 33                                                                                               |
| <b>Negative regulation of immune cells – Cytokines/Cytokines receptors</b> |                                   |                                |                         |          |            |                                                                                                                    |
| 216598_s_at                                                                | CCL2                              | 6347                           | -1.30                   | 1.08E-03 | 3.70E-02   | chemokine (C-C motif) ligand 2                                                                                     |
| 205114_s_at                                                                | CCL3 ///<br>CCL3L1 ///<br>CCL3L3* | 6348 ///<br>6349 ///<br>414062 | -1.27                   | 3.60E-05 | 2.89E-03   | chemokine (C-C motif) ligand 3 /// chemokine (C-C motif) ligand 3-like 1 /// chemokine (C-C motif) ligand 3-like 3 |
| 204103_at                                                                  | CCL4*                             | 6351                           | -1.28                   | 2.85E-05 | 2.38E-03   | chemokine (C-C motif) ligand 4                                                                                     |
| 204655_at                                                                  | CCL5*                             | 6352                           | -1.35                   | 7.56E-03 | 1.27E-01   | chemokine (C-C motif) ligand 5                                                                                     |
| 208075_s_at                                                                | CCL7                              | 6354                           | -1.32                   | 2.56E-02 | 2.41E-01   | chemokine (C-C motif) ligand 7                                                                                     |



## CHF6001 high-throughput gene expression analysis – supplement

| Probe set_ID | Gene Symbol                   | Entrez Gene        | Fold change vs. placebo | p value  | pFDR value | Gene Title                                                                  |
|--------------|-------------------------------|--------------------|-------------------------|----------|------------|-----------------------------------------------------------------------------|
| 210390_s_at  | CCL15 ///<br>CCL15-<br>CCL14* | 6359 ///<br>348249 | -1.81                   | 3.78E-04 | 1.71E-02   | chemokine (C-C motif) ligand 15 /// CCL15-CCL14 readthrough (NMD candidate) |
| 206991_s_at  | CCR5                          | 1234               | -1.29                   | 5.78E-04 | 2.36E-02   | chemokine (C-C motif) receptor 5 (gene/pseudogene)                          |
| 203915_at    | CXCL9                         | 4283               | -1.62                   | 9.28E-03 | 1.43E-01   | chemokine (C-X-C motif) ligand 9                                            |
| 204533_at    | CXCL10                        | 3627               | -1.80                   | 2.06E-02 | 2.16E-01   | chemokine (C-X-C motif) ligand 10                                           |
| 219424_at    | EBI3*                         | 10148              | -1.42                   | 5.08E-05 | 3.82E-03   | Epstein-Barr virus induced 3                                                |
| 201642_at    | IFNGR2*                       | 3460               | -1.11                   | 1.29E-03 | 4.20E-02   | interferon gamma receptor 2 (interferon gamma transducer 1)                 |
| 209575_at    | IL-10RB*                      | 3588               | 1.13                    | 1.48E-03 | 4.60E-02   | interleukin 10 receptor, beta                                               |
| 207901_at    | IL-12B*                       | 3593               | -2.23                   | 4.37E-06 | 5.09E-04   | interleukin 12B                                                             |
| 205992_s_at  | IL-15                         | 3600               | -1.32                   | 5.14E-03 | 1.01E-01   | interleukin 15                                                              |
| 207375_s_at  | IL-15RA                       | 3601               | -1.41                   | 9.41E-03 | 1.44E-01   | interleukin 15 receptor, alpha                                              |
| 205926_at    | IL-27RA*                      | 9466               | -1.30                   | 2.21E-04 | 1.14E-02   | interleukin 27 receptor, alpha                                              |
| 203828_s_at  | IL-32*                        | 9235               | -1.46                   | 4.22E-04 | 1.86E-02   | interleukin 32                                                              |
| 1568574_x_at | SPP1                          | 6696               | -1.27                   | 6.89E-04 | 2.70E-02   | secreted phosphoprotein 1                                                   |
| 207113_s_at  | TNF*                          | 7124               | -1.37                   | 1.78E-02 | 2.01E-01   | tumour necrosis factor                                                      |

## CHF6001 high-throughput gene expression analysis – supplement

| Probe set_ID                                                   | Gene Symbol | Entrez Gene | Fold change vs. placebo | p value  | pFDR value | Gene Title                                                              |
|----------------------------------------------------------------|-------------|-------------|-------------------------|----------|------------|-------------------------------------------------------------------------|
| 229814_at                                                      | TNFAIP8*    | 25816       | -1.33                   | 4.18E-05 | 3.23E-03   | tumour necrosis factor, alpha-induced protein 8                         |
| 227420_at                                                      | TNFAIP8L1*  | 126282      | -1.35                   | 8.20E-05 | 5.49E-03   | tumour necrosis factor, alpha-induced protein 8-like 1                  |
| 238846_at                                                      | TNFRSF11A   | 8792        | -1.32                   | 2.75E-02 | 2.50E-01   | tumour necrosis factor receptor superfamily, member 11a, NFKB activator |
| 241819_at                                                      | TNFSF8*     | 944         | -1.33                   | 6.75E-03 | 1.19E-01   | tumour necrosis factor (ligand) superfamily, member 8                   |
| 229242_at                                                      | TNFSF15*    | 9966        | -1.62                   | 1.79E-04 | 9.88E-03   | tumour necrosis factor (ligand) superfamily, member 15                  |
| <b>Negative regulation of B cells activation/proliferation</b> |             |             |                         |          |            |                                                                         |
| 1568943_at                                                     | INPP5D*     | 3635        | 1.73                    | 1.65E-06 | 2.31E-04   | inositol polyphosphate-5-phosphatase D                                  |
| 1569599_at                                                     | SAMSN1*     | 64092       | 1.44                    | 1.30E-03 | 4.21E-02   | SAM domain, SH3 domain and nuclear localisation signals 1               |
| 241331_at                                                      | SKAP2*      | 8935        | -1.35                   | 1.53E-02 | 1.86E-01   | src kinase associated phosphoprotein 2                                  |
| <b>Negative regulation of complement pathway</b>               |             |             |                         |          |            |                                                                         |
| 208747_s_at                                                    | C1S         | 716         | -1.55                   | 1.82E-04 | 9.99E-03   | complement component 1, s subcomponent                                  |
| 217767_at                                                      | C3*         | 718         | -1.28                   | 3.43E-04 | 1.60E-02   | complement component 3                                                  |
| <b>Negative regulation of cytokine production</b>              |             |             |                         |          |            |                                                                         |
| 222802_at                                                      | EDN1*       | 1906        | -1.85                   | 6.21E-05 | 4.42E-03   | endothelin 1                                                            |
| 207091_at                                                      | P2RX7*      | 5027        | -1.27                   | 3.19E-04 | 1.51E-02   | purinergic receptor P2X, ligand gated ion channel, 7                    |

## CHF6001 high-throughput gene expression analysis – supplement

| Probe set_ID                                                     | Gene Symbol | Entrez Gene | Fold change vs. placebo | p value  | pFDR value | Gene Title                                                                                          |
|------------------------------------------------------------------|-------------|-------------|-------------------------|----------|------------|-----------------------------------------------------------------------------------------------------|
| 206360_s_at                                                      | SOCS3*      | 9021        | 1.43                    | 9.69E-04 | 3.41E-02   | suppressor of cytokine signalling 3                                                                 |
| <b>Negative regulation of eosinophils granule proteins</b>       |             |             |                         |          |            |                                                                                                     |
| 211743_s_at                                                      | PRG2*       | 5553        | -1.36                   | 6.27E-03 | 1.14E-01   | proteoglycan 2, bone marrow (natural killer cell activator, eosinophil granule major basic protein) |
| <b>Negative regulation of fibrosis</b>                           |             |             |                         |          |            |                                                                                                     |
| 205463_s_at                                                      | PDGFA*      | 5154        | -1.32                   | 1.22E-03 | 4.04E-02   | platelet-derived growth factor alpha polypeptide                                                    |
| 204200_s_at                                                      | PDGFB*      | 5155        | -1.51                   | 6.13E-09 | 2.18E-06   | platelet-derived growth factor beta polypeptide                                                     |
| 202388_at                                                        | RGS2*       | 5997        | 1.17                    | 6.56E-08 | 1.63E-05   | regulator of G-protein signalling 2                                                                 |
| 202627_s_at                                                      | SERPINE1*   | 5054        | -1.32                   | 2.98E-05 | 2.45E-03   | serpin peptidase inhibitor, clade E (nexin, plasminogen activator inhibitor type 1), member 1       |
| <b>Negative regulation of matrix metalloproteinases activity</b> |             |             |                         |          |            |                                                                                                     |
| 206134_at                                                        | ADAMDEC1    | 27299       | -1.53                   | 7.08E-05 | 4.93E-03   | ADAM-like, decysin 1                                                                                |
| 201069_at                                                        | MMP2*       | 4313        | -1.32                   | 1.28E-02 | 1.70E-01   | Matrix peptidase 2                                                                                  |
| 204259_at                                                        | MMP7*       | 4316        | -1.71                   | 5.44E-05 | 4.02E-03   | Matrix peptidase 7                                                                                  |
| 204580_at                                                        | MMP12*      | 4321        | -1.36                   | 1.05E-04 | 6.64E-03   | Matrix peptidase 12                                                                                 |
| 202827_s_at                                                      | MMP14*      | 4323        | -1.30                   | 6.09E-04 | 2.46E-02   | Matrix peptidase 14 (membrane-inserted)                                                             |

| Probe set_ID                                                             | Gene Symbol | Entrez Gene | Fold change vs. placebo | p value  | pFDR value | Gene Title                                             |
|--------------------------------------------------------------------------|-------------|-------------|-------------------------|----------|------------|--------------------------------------------------------|
| <b>Negative regulation of mucins like</b>                                |             |             |                         |          |            |                                                        |
| 1553602_at                                                               | MUCL1*      | 118430      | -1.72                   | 1.58E-05 | 1.47E-03   | mucin-like 1                                           |
| <b>Negative regulation of oxidative stress</b>                           |             |             |                         |          |            |                                                        |
| 1569827_at                                                               | ATG7*       | 10533       | -1.34                   | 1.05E-02 | 1.52E-01   | autophagy related 7                                    |
| 206749_at                                                                | CD1B*       | 910         | -1.56                   | 1.03E-03 | 3.57E-02   | CD1b molecule                                          |
| 1570410_at                                                               | CYGB*       | 114757      | 1.22                    | 6.82E-04 | 2.69E-02   | cytoglobin                                             |
| 206697_s_at                                                              | HP*         | 3240        | 1.74                    | 4.18E-07 | 7.48E-05   | haptoglobin                                            |
| 204388_s_at                                                              | MAOA        | 4128        | -1.43                   | 2.37E-04 | 1.20E-02   | monoamine oxidase A                                    |
| 214084_x_at                                                              | NCF1*       | 653361      | -1.36                   | 2.40E-06 | 3.17E-04   | neutrophil cytosolic factor 1                          |
| 223195_s_at                                                              | SESN2*      | 83667       | 1.90                    | 5.96E-15 | 3.78E-11   | sestrin 2                                              |
| <b>Negative regulation of Th2 cytokine production (IL-4, IL5, IL-13)</b> |             |             |                         |          |            |                                                        |
| 205725_at                                                                | SCGB1A1*    | 7356        | 1.75                    | 1.09E-04 | 6.81E-03   | secretoglobin, family 1A, member 1 (uteroglobin)       |
| 214581_x_at                                                              | TNFRSF21*   | 27242       | 1.32                    | 3.92E-03 | 8.58E-02   | tumour necrosis factor receptor superfamily, member 21 |
| <b>Positive regulation of vitamin D pathway</b>                          |             |             |                         |          |            |                                                        |
| 201790_s_at                                                              | DHCR7*      | 1717        | 1.42                    | 3.29E-06 | 4.07E-04   | 7-dehydrocholesterol reductase                         |
| 202426_s_at                                                              | RXRA*       | 6256        | 1.30                    | 2.28E-04 | 1.17E-02   | retinoid X receptor alpha                              |

CHF6001 high-throughput gene expression analysis – supplement

| Probe set_ID | Gene Symbol | Entrez Gene | Fold change vs. placebo | p value  | pFDR value | Gene Title                                     |
|--------------|-------------|-------------|-------------------------|----------|------------|------------------------------------------------|
| 213692_s_at  | VDR*        | 7421        | 1.35                    | 6.81E-06 | 7.37E-04   | vitamin D (1,25- dihydroxyvitamin D3) receptor |

Abbreviations: BID, twice daily.

Figure S6. Network of genes associated with the pathophysiology of COPD, differentially expressed ( $pFDR < 0.05$  or  $p < 0.05$  and  $|FC| > 1.3$ ) in favour of reduced inflammatory conditions after treatment with CHF6001 1600  $\mu\text{g}$  BID relative to placebo. Each node represents all the proteins produced by a single, protein-coding gene locus, edges represent proteins that jointly contribute to a shared function, and the information inside the circle describes protein structure. Edges: a red line indicates the presence of fusion evidence; a green line, neighbourhood evidence; a blue line, co-occurrence evidence; a magenta line, experimental evidence; a yellow line, text mining evidence; a light blue line, database evidence; a black line, co-expression evidence; a purple line, protein homology evidence. A green halo around the nodes: downregulation, a red halo: upregulation \* on the nodes:  $p < 0.05$  and  $|FC| > 1.3$

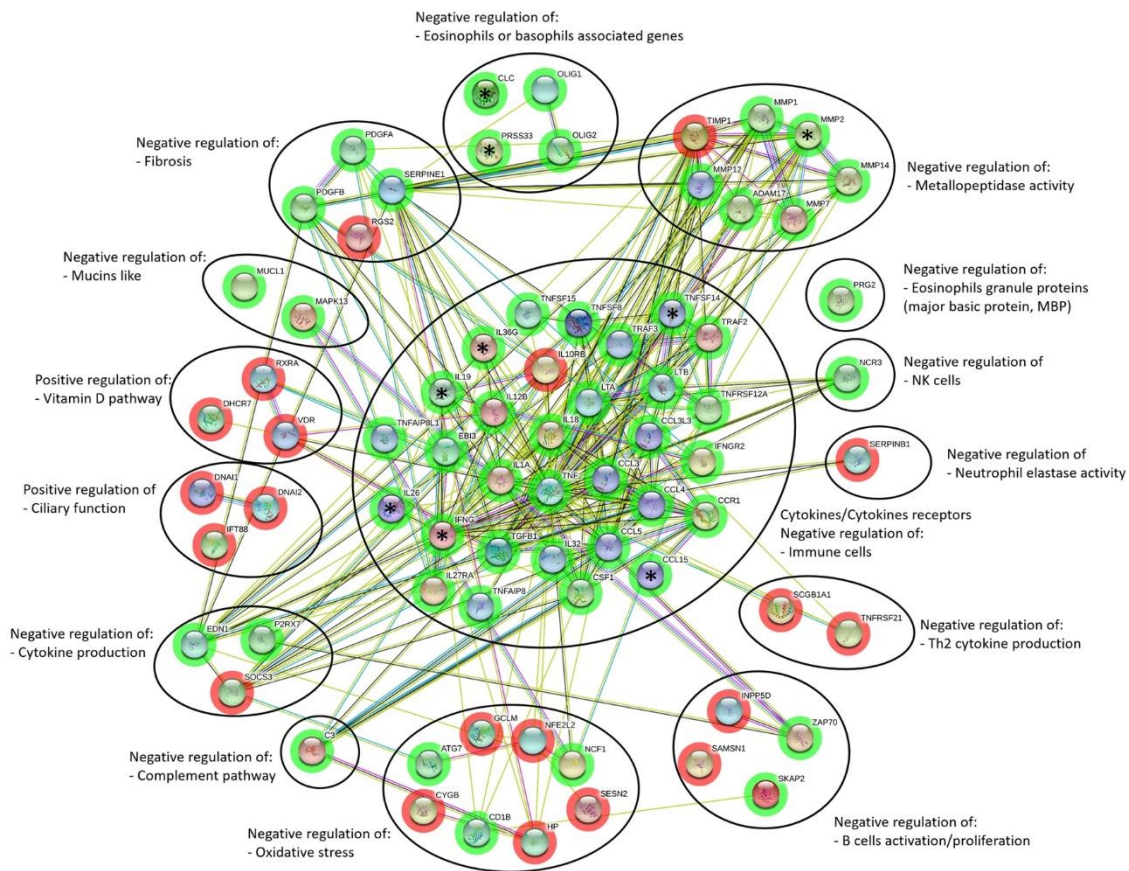

Table S6. Genes associated with the pathophysiology of COPD and differentially expressed in favour of reduced inflammatory conditions after treatment with CHF6001 1600 µg BID relative to placebo. \* common genes with CHF6001 800 µg BID.

| Probe set_ID                                                               | Gene Symbol                       | Entrez Gene                    | Fold change vs. placebo | p value  | pFDR value | Gene Title                                                                                                         |
|----------------------------------------------------------------------------|-----------------------------------|--------------------------------|-------------------------|----------|------------|--------------------------------------------------------------------------------------------------------------------|
| <b>Negative regulation of eosinophil or basophil related genes</b>         |                                   |                                |                         |          |            |                                                                                                                    |
| 206207_at                                                                  | CLC*                              | 1178                           | -1.36                   | 2.93E-02 | 1.84E-01   | Charcot-Leyden crystal galectin                                                                                    |
| 228170_at                                                                  | OLIG1*                            | 116448                         | -2.25                   | 1.37E-08 | 1.52E-06   | oligodendrocyte transcription factor 1                                                                             |
| 213825_at                                                                  | OLIG2*                            | 10215                          | -2.39                   | 4.50E-12 | 1.48E-09   | oligodendrocyte lineage transcription factor 2                                                                     |
| 1552349_a_at                                                               | PRSS33*                           | 260429                         | -1.32                   | 1.70E-02 | 1.32E-01   | protease, serine, 33                                                                                               |
| <b>Negative regulation of immune cells – Cytokines/Cytokines receptors</b> |                                   |                                |                         |          |            |                                                                                                                    |
| 205114_s_at                                                                | CCL3 ///<br>CCL3L1 ///<br>CCL3L3* | 6348 ///<br>6349 ///<br>414062 | -1.39                   | 3.67E-08 | 3.63E-06   | chemokine (C-C motif) ligand 3 /// chemokine (C-C motif) ligand 3-like 1 /// chemokine (C-C motif) ligand 3-like 3 |
| 204103_at                                                                  | CCL4*                             | 6351                           | -1.38                   | 1.63E-07 | 1.34E-05   | chemokine (C-C motif) ligand 4                                                                                     |
| 1555759_a_at                                                               | CCL5*                             | 6352                           | -1.42                   | 2.10E-03 | 3.13E-02   | chemokine (C-C motif) ligand 5                                                                                     |
| 210390_s_at                                                                | CCL15 ///<br>CCL15-<br>CCL14*     | 6359 ///<br>348249             | -1.50                   | 1.16E-02 | 1.03E-01   | chemokine (C-C motif) ligand 15 /// CCL15-CCL14 readthrough (NMD candidate)                                        |
| 205099_s_at                                                                | CCR1                              | 1230                           | -1.30                   | 6.41E-05 | 2.07E-03   | chemokine (C-C motif) receptor 1                                                                                   |

## CHF6001 high-throughput gene expression analysis – supplement

| Probe set_ID | Gene Symbol | Entrez Gene | Fold change vs. placebo | p value  | pFDR value | Gene Title                                                  |
|--------------|-------------|-------------|-------------------------|----------|------------|-------------------------------------------------------------|
| 209716_at    | CSF1        | 1435        | -1.35                   | 1.53E-03 | 2.50E-02   | colony stimulating factor 1 (macrophage)                    |
| 219424_at    | EBI3*       | 10148       | -1.35                   | 3.46E-04 | 8.00E-03   | Epstein-Barr virus induced 3                                |
| 210354_at    | IFNG        | 3458        | -1.52                   | 1.85E-02 | 1.39E-01   | interferon, gamma                                           |
| 201642_at    | IFNGR2*     | 3460        | -1.13                   | 3.59E-04 | 8.25E-03   | interferon gamma receptor 2 (interferon gamma transducer 1) |
| 210118_s_at  | IL-1A       | 3552        | -1.53                   | 1.51E-03 | 2.48E-02   | interleukin 1 alpha                                         |
| 209575_at    | IL-10RB*    | 3588        | 1.14                    | 3.27E-04 | 7.66E-03   | interleukin 10 receptor, beta                               |
| 207901_at    | IL-12B*     | 3593        | -1.86                   | 2.83E-04 | 6.84E-03   | interleukin 12B                                             |
| 206295_at    | IL-18       | 3606        | -1.35                   | 2.96E-04 | 7.10E-03   | interleukin 18                                              |
| 220745_at    | IL-19       | 29949       | -1.34                   | 2.75E-02 | 1.77E-01   | interleukin 19                                              |
| 221111_at    | IL-26       | 55801       | -1.35                   | 8.10E-03 | 8.11E-02   | interleukin 26                                              |
| 205926_at    | IL-27RA*    | 9466        | -1.32                   | 1.00E-04 | 2.98E-03   | interleukin 27 receptor, alpha                              |
| 203828_s_at  | IL-32*      | 9235        | -1.45                   | 4.17E-04 | 9.30E-03   | interleukin 32                                              |
| 220322_at    | IL-36G      | 56300       | -1.38                   | 3.96E-02 | 2.20E-01   | interleukin 36, gamma                                       |
| 206975_at    | LTA         | 4049        | -1.29                   | 7.47E-05 | 2.36E-03   | lymphotoxin alpha                                           |
| 207339_s_at  | LTB         | 4050        | -1.38                   | 2.93E-03 | 3.97E-02   | lymphotoxin beta (TNF superfamily, member 3)                |
| 203085_s_at  | TGFB1       | 7040        | -1.15                   | 1.40E-03 | 2.35E-02   | transforming growth factor beta 1                           |



## CHF6001 high-throughput gene expression analysis – supplement

| Probe set_ID                                                   | Gene Symbol | Entrez Gene | Fold change vs. placebo | p value  | pFDR value | Gene Title                                                    |
|----------------------------------------------------------------|-------------|-------------|-------------------------|----------|------------|---------------------------------------------------------------|
| 207113_s_at                                                    | TNF*        | 7124        | -1.86                   | 6.00E-06 | 2.91E-04   | tumour necrosis factor                                        |
| 229814_at                                                      | TNFAIP8*    | 25816       | -1.24                   | 1.54E-03 | 2.51E-02   | tumour necrosis factor, alpha-induced protein 8               |
| 227420_at                                                      | TNFAIP8L1*  | 126282      | -1.29                   | 5.81E-04 | 1.20E-02   | tumour necrosis factor, alpha-induced protein 8-like 1        |
| 218368_s_at                                                    | TNFRSF12A   | 51330       | -1.20                   | 3.40E-04 | 7.89E-03   | tumour necrosis factor receptor superfamily, member 12A       |
| 241819_at                                                      | TNFSF8*     | 944         | -1.46                   | 4.08E-04 | 9.14E-03   | tumour necrosis factor (ligand) superfamily, member 8         |
| 207907_at                                                      | TNFSF14     | 8740        | -1.36                   | 6.81E-03 | 7.19E-02   | tumour necrosis factor (ligand) superfamily, member 14        |
| 229242_at                                                      | TNFSF15*    | 9966        | -1.74                   | 1.47E-05 | 6.20E-04   | tumour necrosis factor (ligand) superfamily, member 15        |
| 204413_at                                                      | TRAF2       | 7186        | -1.11                   | 9.45E-04 | 1.74E-02   | TNF receptor-associated factor 2                              |
| 208315_x_at                                                    | TRAF3       | 7187        | -1.15                   | 1.65E-03 | 2.64E-02   | TNF receptor-associated factor 3                              |
| <b>Negative regulation of B cells activation/proliferation</b> |             |             |                         |          |            |                                                               |
| 1568943_at                                                     | INPP5D*     | 3635        | 2.16                    | 1.25E-10 | 2.60E-08   | inositol polyphosphate-5-phosphatase D                        |
| 1555638_a_at                                                   | SAMSN1*     | 64092       | 1.38                    | 1.93E-08 | 2.06E-06   | SAM domain, SH3 domain and nuclear localisation signals 1     |
| 241331_at                                                      | SKAP2*      | 8935        | -1.51                   | 8.95E-04 | 1.67E-02   | src kinase associated phosphoprotein 2                        |
| 1555613_a_at                                                   | ZAP70       | 7535        | -1.11                   | 1.28E-03 | 2.20E-02   | zeta chain of T cell receptor associated protein kinase 70kDa |
| <b>Negative regulation of complement pathway</b>               |             |             |                         |          |            |                                                               |
| 217767_at                                                      | C3*         | 718         | -1.29                   | 1.78E-04 | 4.76E-03   | complement component 3                                        |

| Probe set_ID                                                     | Gene Symbol | Entrez Gene | Fold change vs. placebo | p value  | pFDR value | Gene Title                                                                                          |
|------------------------------------------------------------------|-------------|-------------|-------------------------|----------|------------|-----------------------------------------------------------------------------------------------------|
| <b>Negative regulation of cytokine production</b>                |             |             |                         |          |            |                                                                                                     |
| 222802_at                                                        | EDN1*       | 1906        | -2.08                   | 1.83E-06 | 1.07E-04   | endothelin 1                                                                                        |
| 207091_at                                                        | P2RX7*      | 5027        | -1.35                   | 5.97E-06 | 2.90E-04   | purinergic receptor P2X, ligand gated ion channel, 7                                                |
| 206359_at                                                        | SOCS3*      | 9021        | 1.42                    | 1.08E-05 | 4.77E-04   | suppressor of cytokine signalling 3                                                                 |
| <b>Negative regulation of eosinophils granule proteins</b>       |             |             |                         |          |            |                                                                                                     |
| 211743_s_at                                                      | PRG2*       | 5553        | -1.38                   | 3.38E-03 | 4.38E-02   | proteoglycan 2, bone marrow (natural killer cell activator, eosinophil granule major basic protein) |
| <b>Negative regulation of fibrosis</b>                           |             |             |                         |          |            |                                                                                                     |
| 205463_s_at                                                      | PDGFA*      | 5154        | -1.33                   | 8.77E-04 | 1.64E-02   | platelet-derived growth factor alpha polypeptide                                                    |
| 204200_s_at                                                      | PDGFB*      | 5155        | -1.48                   | 1.03E-08 | 1.19E-06   | platelet-derived growth factor beta polypeptide                                                     |
| 202388_at                                                        | RGS2*       | 5997        | 1.22                    | 9.04E-11 | 2.02E-08   | regulator of G-protein signalling 2                                                                 |
| 202628_s_at                                                      | SERPINE1*   | 5054        | -1.44                   | 6.94E-05 | 2.22E-03   | serpin peptidase inhibitor, clade E (nexin, plasminogen activator inhibitor type 1), member 1       |
| <b>Negative regulation of matrix metalloproteinases activity</b> |             |             |                         |          |            |                                                                                                     |
| 213532_at                                                        | ADAM17      | 6868        | -1.12                   | 6.10E-04 | 1.25E-02   | ADAM metallopeptidase domain 17                                                                     |
| 204475_at                                                        | MMP1        | 4312        | -1.56                   | 1.16E-03 | 2.03E-02   | matrix metallopeptidase 1                                                                           |

## CHF6001 high-throughput gene expression analysis – supplement

| Probe set_ID                                               | Gene Symbol | Entrez Gene | Fold change vs. placebo | p value  | pFDR value | Gene Title                                                |
|------------------------------------------------------------|-------------|-------------|-------------------------|----------|------------|-----------------------------------------------------------|
| 201069_at                                                  | MMP2*       | 4313        | -1.31                   | 1.22E-02 | 1.07E-01   | matrix metalloproteinase 2                                |
| 204259_at                                                  | MMP7*       | 4316        | -1.58                   | 4.11E-04 | 9.17E-03   | matrix metalloproteinase 7                                |
| 204580_at                                                  | MMP12*      | 4321        | -1.47                   | 1.56E-06 | 9.36E-05   | matrix metalloproteinase 12                               |
| 217279_x_at                                                | MMP14*      | 4323        | -1.15                   | 4.52E-05 | 1.56E-03   | matrix metalloproteinase 14 (membrane-inserted)           |
| 201666_at                                                  | TIMP1       | 7076        | 1.12                    | 2.49E-04 | 6.19E-03   | TIMP metalloproteinase inhibitor 1                        |
| <b>Negative regulation of mucins like</b>                  |             |             |                         |          |            |                                                           |
| 210059_s_at                                                | MAPK13      | 5603        | -1.21                   | 2.19E-05 | 8.62E-04   | mitogen-activated protein kinase 13                       |
| 1553602_at                                                 | MUCL1*      | 118430      | -1.44                   | 2.18E-03 | 3.22E-02   | mucin-like 1                                              |
| <b>Negative regulation of neutrophil elastase activity</b> |             |             |                         |          |            |                                                           |
| 239213_at                                                  | SERPINB1    | 1992        | 1.56                    | 1.01E-04 | 3.01E-03   | serpin peptidase inhibitor, clade B (ovalbumin), member 1 |
| <b>Negative regulation of NK cells</b>                     |             |             |                         |          |            |                                                           |
| 211010_s_at                                                | NCR3        | 259197      | -1.14                   | 2.67E-03 | 3.74E-02   | natural cytotoxicity triggering receptor 3                |
| <b>Negative regulation of oxidative stress</b>             |             |             |                         |          |            |                                                           |
| 1569827_at                                                 | ATG7*       | 10533       | -1.37                   | 3.63E-03 | 4.62E-02   | autophagy related 7                                       |
| 206749_at                                                  | CD1B*       | 910         | -1.56                   | 9.09E-04 | 1.69E-02   | CD1b molecule                                             |
| 1570410_at                                                 | CYGB*       | 114757      | 1.20                    | 1.77E-03 | 2.77E-02   | cytoglobin                                                |

## CHF6001 high-throughput gene expression analysis – supplement

| Probe set_ID                                                              | Gene Symbol | Entrez Gene | Fold change vs. placebo | p value  | pFDR value | Gene Title                                             |
|---------------------------------------------------------------------------|-------------|-------------|-------------------------|----------|------------|--------------------------------------------------------|
| 203925_at                                                                 | GCLM        | 2730        | 1.52                    | 5.88E-06 | 2.86E-04   | glutamate-cysteine ligase, modifier subunit            |
| 206697_s_at                                                               | HP*         | 3240        | 1.39                    | 1.06E-03 | 1.90E-02   | haptoglobin                                            |
| 214084_x_at                                                               | NCF1*       | 653361      | -1.35                   | 3.70E-06 | 1.94E-04   | neutrophil cytosolic factor 1                          |
| 201146_at                                                                 | NFE2L2      | 4780        | 1.15                    | 1.89E-03 | 2.90E-02   | nuclear factor, erythroid 2-like 2                     |
| 223195_s_at                                                               | SESN2*      | 83667       | 2.22                    | 3.69E-20 | 3.78E-16   | sestrin 2                                              |
| <b>Negative regulation of Th2 cytokines production (IL-4, IL5, IL-13)</b> |             |             |                         |          |            |                                                        |
| 205725_at                                                                 | SCGB1A1*    | 7356        | 1.58                    | 1.05E-03 | 1.88E-02   | secretoglobin, family 1A, member 1 (uteroglobin)       |
| 214581_x_at                                                               | TNFRSF21*   | 27242       | 1.44                    | 1.27E-04 | 3.61E-03   | tumour necrosis factor receptor superfamily, member 21 |
| <b>Positive regulation of ciliary function</b>                            |             |             |                         |          |            |                                                        |
| 220125_at                                                                 | DNAI1       | 27019       | 1.50                    | 1.13E-03 | 1.98E-02   | dynein, axonemal, intermediate chain 1                 |
| 220636_at                                                                 | DNAI2       | 64446       | 1.49                    | 1.89E-04 | 4.97E-03   | dynein, axonemal, intermediate chain 2                 |
| 204703_at                                                                 | IFT88       | 8100        | 1.23                    | 2.74E-04 | 6.69E-03   | intraflagellar transport 88                            |
| <b>Positive regulation of vitamin D pathway</b>                           |             |             |                         |          |            |                                                        |
| 201790_s_at                                                               | DHCR7*      | 1717        | 1.50                    | 6.66E-08 | 6.14E-06   | 7-dehydrocholesterol reductase                         |
| 202426_s_at                                                               | RXRA*       | 6256        | 1.29                    | 3.41E-04 | 7.91E-03   | retinoid X receptor alpha                              |
| 204254_s_at                                                               | VDR*        | 7421        | 1.30                    | 6.28E-08 | 5.81E-06   | vitamin D (1,25- dihydroxyvitamin D3) receptor         |

## References

1. Irizarry RA, Bolstad BM, Collin F, Cope LM, Hobbs B, Speed TP. Summaries of Affymetrix GeneChip probe level data. *Nucleic Acids Res.* 2003;31:e15.
2. Stockley RA, Wiley InterScience (Online service). Chronic obstructive pulmonary disease. 2007.
3. Barnes PJ, Drazen JM, Rennard SI, Thomson NC, editors. *Asthma and COPD: Basic mechanisms and clinical management.* 2nd ed. [Oxford, UK]: Academic Press; 2008.
4. Sotgiu G, Radovanovic D, Santus P. Promise and limitations of relaxin-based therapies in chronic fibrotic lung diseases. *Am. J. Respir. Crit. Care Med.* 2007;20:258–64.
5. Sundar IK, Hwang J-W, Wu S, Sun J, Rahman I. Deletion of vitamin D receptor leads to premature emphysema/COPD by increased matrix metalloproteinases and lymphoid aggregates formation. *Biochem. Biophys. Res. Commun.* 2011;406:127–33. doi:10.1016/j.bbrc.2011.02.011
6. Ishii M, Yamaguchi Y, Nakamura T, Akishita M. The vitamin D receptors may function as antiinflammatory effects in patients with COPD. *Chest* 2015;148:690. doi:10.1378/chest.2249480
7. García de Tena J, El Hachem Debek A, Hernández Gutiérrez C, Izquierdo Alonso JL. The role of vitamin D in chronic obstructive pulmonary disease, asthma and other respiratory diseases. *Arch. Bronconeumol.* 2014;50:179–84. doi:10.1016/j.arbr.2014.03.015
8. Yew-Booth L, Birrell MA, Lau MS, Baker K, Jones V, Kilty I, et al. JAK-STAT pathway activation in COPD. *Eur. Respir. J.* 2015;46:843–5. doi:10.1183/09031936.00228414
9. Yanagisawa S, Baker JR, Vuppusetty C, Fenwick P, Donnelly LE, Ito K, et al. Decreased phosphatase PTEN amplifies PI3K signaling and enhances proinflammatory cytokine release in COPD. *Am J Physiol Lung Cell Mol Physiol* 2017;313:230–9. doi:10.1152/ajplung.00382.2016.-The
10. Walker JKL, Fisher JT. Editorial overview: Respiratory: GPCR signaling and the lung. *Curr. Opin. Pharmacol.* 2014;16:iv–vi. doi:10.1016/j.coph.2014.05.006
11. Oldenburger A, Roscioni SS, Jansen E, Menzen MH, Halayko AJ, Timens W, et al. Anti-inflammatory role of the cAMP effectors Epac and PKA: Implications in chronic obstructive pulmonary disease. *PLoS One* 2012;7:e31574. doi:10.1371/journal.pone.0031574
12. Brown WM. Treating COPD with PDE 4 inhibitors. *Int. J. Chron. Obstruct. Pulmon. Dis.* 2007;2:517–33.
13. Barnes PJ. The cytokine network in asthma and chronic obstructive pulmonary disease. *J. Clin. Invest.* 2008;118:3546–56. doi:10.1172/JCI36130
14. Belvisi MG, Mitchell JA. Targeting PPAR receptors in the airway for the treatment of inflammatory lung disease. *Br. J. Pharmacol.* 2009;158:994–1003. doi:10.1111/j.1476-5381.2009.00373.x
15. Siafakas N, editor. *Management of Chronic Obstructive Pulmonary Disease.* [Lausanne, Switzerland]: European Respiratory Society; 2006.
16. Medina-Tato DA, Ward SG, Watson ML. Phosphoinositide 3-kinase signalling in lung disease: leucocytes and beyond. *Immunology* 2007;121:448–61. doi:10.1111/j.1365-2567.2007.02663.x
17. Murray PJ. The JAK-STAT signaling pathway: Input and output integration. *J. Immunol.* 2007;178:2623–9. doi:10.4049/JIMMUNOL.178.5.2623
18. Barnes PJ. Inflammatory mechanisms in patients with chronic obstructive pulmonary

- disease. *J. Allergy Clin. Immunol.* 2016;138:16–27. doi:10.1016/j.jaci.2016.05.011
19. Costa C, Traves SL, Tudhope SJ, Fenwick PS, Belchamber KBR, Russell REK, et al. Enhanced monocyte migration to CXCR3 and CCR5 chemokines in COPD. *Eur. Respir. J.* 2016;47:1093–102. doi:10.1183/13993003.01642-2015
20. Radsak MP, Taube C, Haselmayer P, Tenzer S, Salih HR, Wiewrodt R, et al. Soluble triggering receptor expressed on myeloid cells 1 is released in patients with stable chronic obstructive pulmonary disease. *Clin. Dev. Immunol.* 2007;2007:52040. doi:10.1155/2007/52040
21. Freeman CM, Martinez FJ, Han MK, Ames TM, Chensue SW, Todt JC, et al. Lung dendritic cell expression of maturation molecules increases with worsening chronic obstructive pulmonary disease. *Am. J. Respir. Crit. Care Med.* 2009;180:1179–88. doi:10.1164/rccm.200904-0552OC
22. Kanazawa H, Tochino Y, Asai K, Hirata K. Simultaneous assessment of hepatocyte growth factor and vascular endothelial growth factor in epithelial lining fluid from patients with COPD. *Chest* 2014;146:1159–65. doi:10.1378/chest.14-0373
23. Faner R, Sobradillo P, Noguera A, Gomez C, Cruz T, López-Giraldo A, et al. The inflammasome pathway in stable COPD and acute exacerbations. *ERJ Open Research* 2016;2:00002–2016. doi:10.1183/23120541.00002-2016
24. Pouwels SD, van Geffen WH, Jonker MR, Kerstjens HAM, Nawijn MC, Heijink IH. Increased neutrophil expression of pattern recognition receptors during COPD exacerbations. *Respirology* 2017;22:401–4. doi:10.1111/resp.12912
25. Kinose D, Ogawa E, Kudo M, Marumo S, Kiyokawa H, Hoshino Y, et al. Association of COPD exacerbation frequency with gene expression of pattern recognition receptors in inflammatory cells in induced sputum. *Clin. Respir. J.* 2016;10:11–21. doi:10.1111/crj.12171
26. Culley FJ. Natural killer cells in infection and inflammation of the lung. *Immunology* 2009;128:151–63. doi:10.1111/j.1365-2567.2009.03167.x
27. Kim JH, Jang YJ. Role of natural killer cells in airway inflammation. *Allergy. Asthma Immunol. Res.* 2018;10:448–56. doi:10.4168/aaair.2018.10.5.448
28. Carman C V. Mechanisms for transcellular diapedesis: probing and pathfinding by 'invadosome-like protrusions'. *J. Cell Sci.* 2009;122:3025–35. doi:10.1242/jcs.047522
29. Gangemi S, Casciaro M, Trapani G, Quartuccio S, Navarra M, Pioggia G, et al. Association between HMGB1 and COPD: A Systematic Review. *Mediators Inflamm.* 2015;2015:164913. doi:10.1155/2015/164913
30. Rahman I, MacNee W. Role of transcription factors in inflammatory lung diseases. *Thorax* 1998;53:601–12. doi:10.1136/THX.53.7.601
31. Schuliga M. NF-kappaB signaling in chronic inflammatory airway disease. *Biomolecules* 2015;5:1266–83. doi:10.3390/biom5031266
32. Domej W, Oettl K, Renner W. Oxidative stress and free radicals in COPD--implications and relevance for treatment. *Int. J. Chron. Obstruct. Pulmon. Dis.* 2014;9:1207–24. doi:10.2147/COPD.S51226
33. Chen J, Liao M, Gao X, Zhong Q, Tang T, Yu X, et al. IL-17A induces pro-inflammatory cytokines production in macrophages via MAPKinases, NF-κB and AP-1. *Cell. Physiol. Biochem.* 2013;32:1265–74. doi:10.1159/000354525
34. Eustace A, Smyth LJC, Mitchell L, Williamson K, Plumb J, Singh D. Identification of cells expressing IL-17A and IL-17F in the lungs of patients with COPD. *Chest* 2011;139:1089–100. doi:10.1378/CHEST.10-0779
35. Nixon J, Newbold P, Mustelin T, Anderson GP, Kolbeck R. Monoclonal antibody therapy

- for the treatment of asthma and chronic obstructive pulmonary disease with eosinophilic inflammation. *Pharmacol. Ther.* 2017;169:57–77.  
doi:10.1016/J.PHARMTHERA.2016.10.016
36. Pinto-Plata V, Toso J, Lee K, Park D, Bilello J, Mullerova H, et al. Profiling serum biomarkers in patients with COPD: associations with clinical parameters. *Thorax* 2007;62:595–601. doi:10.1136/thx.2006.064428
37. Mercer BA, D'Armiento JM. Emerging role of MAP kinase pathways as therapeutic targets in COPD. *Int. J. Chron. Obstruct. Pulmon. Dis.* 2006;1:137–50.
38. Fawzy A, Putcha N, Paulin LM, Aaron CP, Labaki WW, Han MK, et al. Association of thrombocytosis with COPD morbidity: the SPIROMICS and COPDGene cohorts. *Respir. Res.* 2018;19:20. doi:10.1186/s12931-018-0717-z
39. Karagiannis K, Proklou A, Tsitoura E, Lasithiotaki I, Kalpadaki C, Moraitaki D, et al. Impaired mRNA expression of the migration related chemokine receptor *cxcr4* in mesenchymal stem cells of COPD patients. *Int. J. Inflam.* 2017;2017:1–8.  
doi:10.1155/2017/6089425
40. Jubrail J, Kurian N, Niedergang F. Macrophage phagocytosis cracking the defect code in COPD. *Biomed. J.* 2017;40:305–12. doi:10.1016/j.bj.2017.09.004
41. Yoshikawa T, Dent G, Ward J, Angco G, Nong G, Nomura N, et al. Impaired neutrophil chemotaxis in chronic obstructive pulmonary disease. *Am. J. Respir. Crit. Care Med.* 2007;175:473–9. doi:10.1164/rccm.200507-1152OC
42. Markoulaki D, Kostikas K, Papatheodorou G, Koutsokera A, Alchanatis M, Bakakos P, et al. Hemoglobin, erythropoietin and systemic inflammation in exacerbations of chronic obstructive pulmonary disease. *Eur. J. Intern. Med.* 2011;22:103–7.  
doi:10.1016/j.ejim.2010.07.010
43. Shimbara A, Christodoulouopoulos P, Soussi-Gounni A, Olivenstein R, Nakamura Y, Levitt RC, et al. IL-9 and its receptor in allergic and nonallergic lung disease: Increased expression in asthma. *J. Allergy Clin. Immunol.* 2000;105:108–15. doi:10.1016/S0091-6749(00)90185-4
44. O'Donnell RA, Richter A, Ward J, Angco G, Mehta A, Rousseau K, et al. Expression of ErbB receptors and mucins in the airways of long term current smokers. *Thorax* 2004;59:1032–40. doi:10.1136/thx.2004.028043
45. Creutzberg EC, Casaburi R. Endocrinological disturbances in chronic obstructive pulmonary disease. *Eur. Respir. J. Suppl.* 2003;46:76s-80s.  
doi:10.1183/09031936.03.00004610
46. Holden NS, George T, Rider CF, Chandrasekhar A, Shah S, Kaur M, et al. Induction of regulator of G-Protein Signaling 2 expression by long-acting 2-adrenoceptor agonists and glucocorticoids in human airway epithelial cells. *J. Pharmacol. Exp. Ther.* 2013;348:12–24.  
doi:10.1124/jpet.113.204586
47. Pomeranke A, Lea SR, Herrick S, Lindsay MA, Singh D. Characterization of TLR-induced inflammatory responses in COPD and control lung tissue explants. *Int. J. Chron. Obstruct. Pulmon. Dis.* 2016;11:2409–17. doi:10.2147/COPD.S105156
48. Shaykhiev R, Salit J, Crystal RG. Small airway epithelium of smokers with COPD exhibits an altered cell cycle-related gene expression profile. *Am. J. Respir. Crit. Care Med.* 2009;179:A1905.
49. Chand S, Mehta N, Bahia MS, Dixit A, Silakari O. Protein kinase C-theta inhibitors: a novel therapy for inflammatory disorders. *Curr. Pharm. Des.* 2012;18:4725–46.
50. Biljak VR, Rumora L, Čepelak I, Pancirov D, Popović-Grle S, Sorić J, et al. Glutathione cycle in stable chronic obstructive pulmonary disease. *Cell Biochem. Funct.* 2010;28:448–53. doi:10.1002/cbf.1675

51. Petrusca DN, Gu Y, Adamowicz JJ, Rush NI, Hubbard WC, Smith PA, et al. Sphingolipid-mediated inhibition of apoptotic cell clearance by alveolar macrophages. *J. Biol. Chem.* 2010;285:40322–32. doi:10.1074/jbc.M110.137604
52. Nurwidya F, Damayanti T, Yunus F. The role of innate and adaptive immune cells in the immunopathogenesis of chronic obstructive pulmonary disease. *Tuberc. Respir. Dis. (Seoul)*. 2016;79:5–13. doi:10.4046/trd.2016.79.1.5
53. Stolarczyk M, Scholte BJ. The EGFR-ADAM17 axis in chronic obstructive pulmonary disease and cystic fibrosis lung pathology. *Mediators Inflamm.* 2018;2018:1–22. doi:10.1155/2018/1067134
54. Hodge S, Hodge G, Holmes M, Reynolds PN. Increased airway epithelial and T-cell apoptosis in COPD remains despite smoking cessation. *Eur. Respir. J.* 2005;25:447–54. doi:10.1183/09031936.05.00077604
